# Supplementary material
Source: PubMed Central journal article supplement (PMC3974210)
Supplement: NIHMS550643-supplement-01.pdf [file NIHMS550643-supplement-01.pdf]

Used in our work experimental setup for generation of gaseous methylnitrite,  $\text{CH}_3\text{ONO}$ .

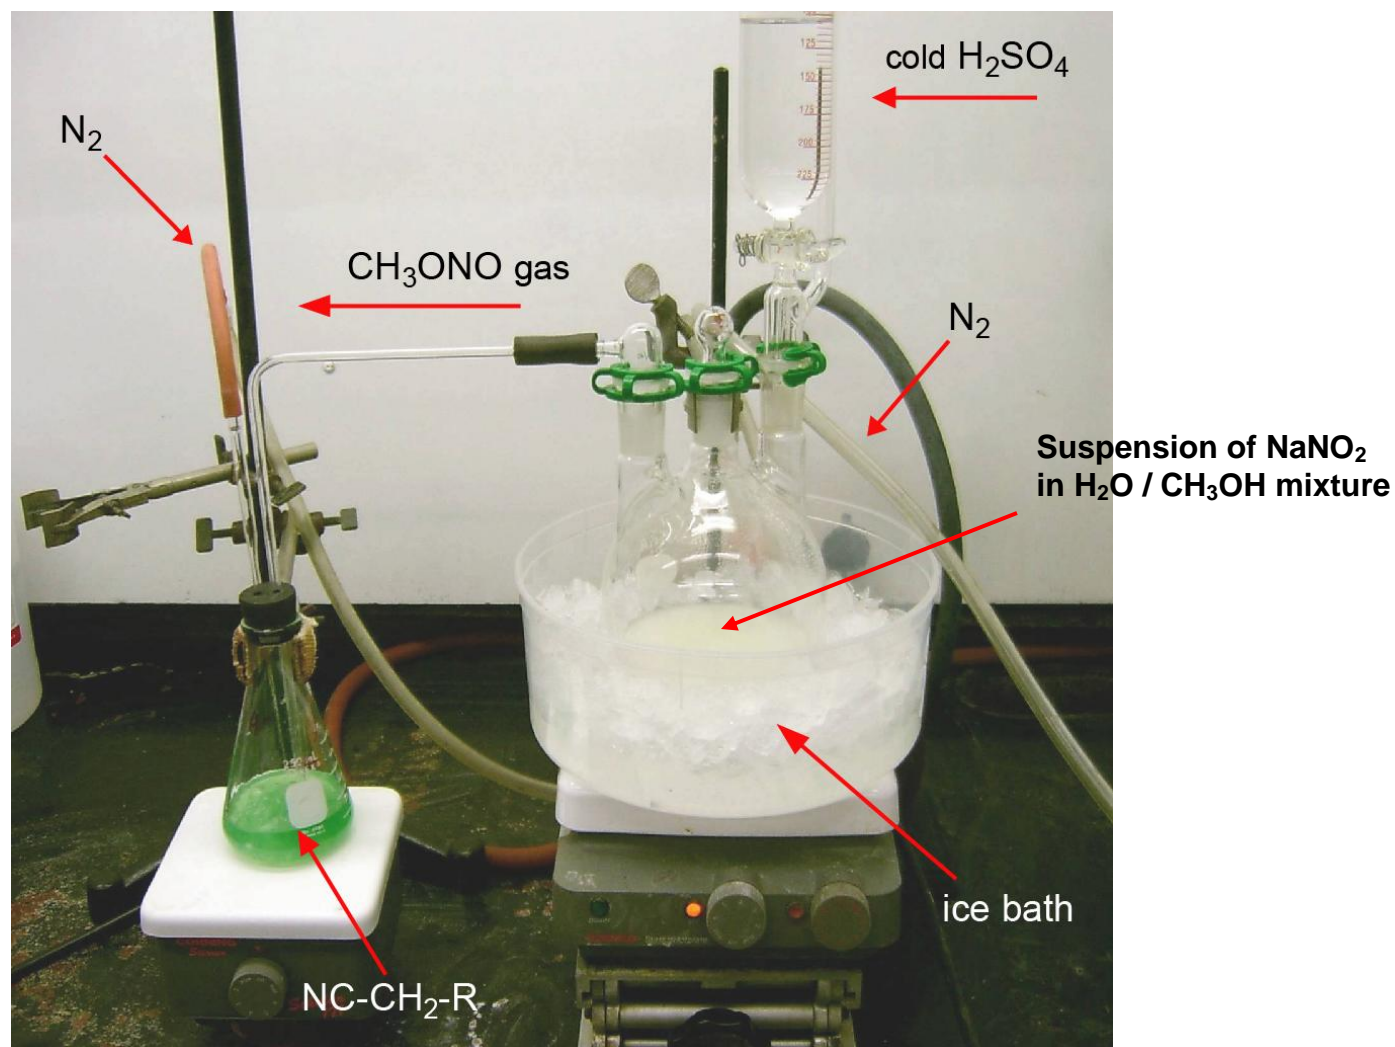

Sample holders were prepared from four strips of black cardboard, tape, and white paper. Next, the Ag(I)-cyanoximate salt was compressed into a uniform thickness on each sample holder (Figure 5.) The samples were then tested for “adhesiveness” via tapping to ensure they would not fall off mid-measurement in the spectrophotometer. The samples rested in a wooden apparatus that held them in place.

Preparation of solid samples of **3** and **6** for photophysical studies: **A** – placement and spreading of finely ground compounds onto the black cardboard; **B** – cardboard attached to the sample holder;

**A**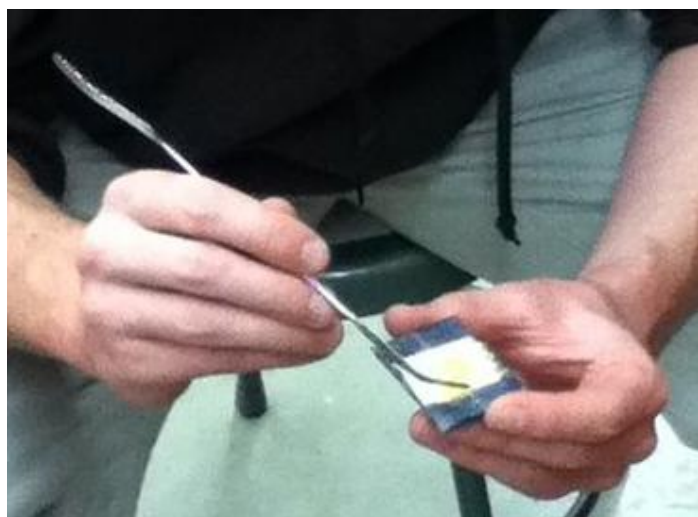**B**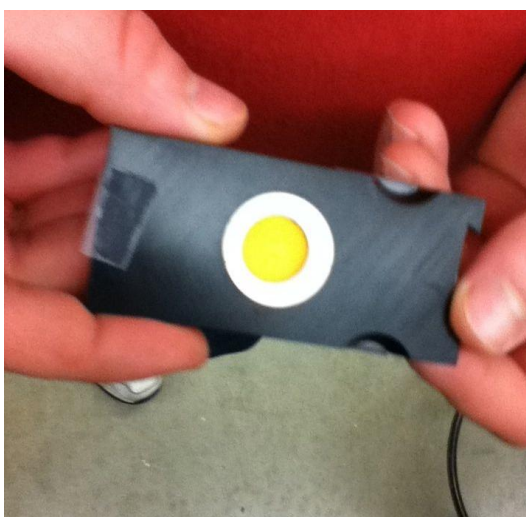

The UV light was laid directly on top of the wooden holder, approximately 2 cm away from the samples. The samples were exposed to thirty minutes of 254 nm light. After each round of thirty minutes, the samples were removed from the UV light, photographed, and their reflectance spectra were recorded.

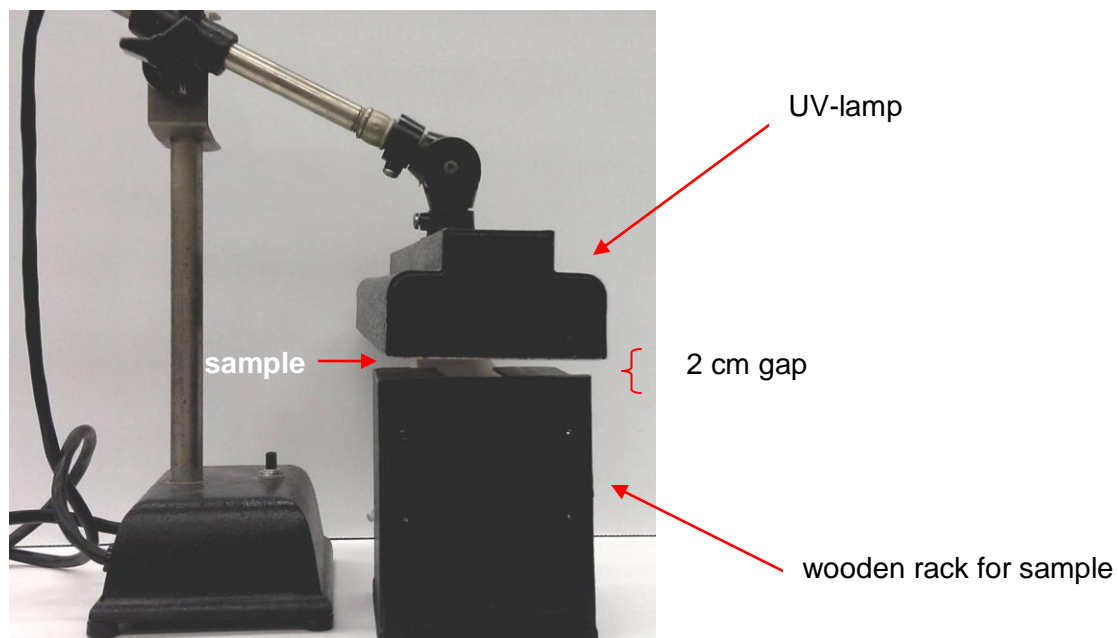

The integrating sphere (an accessory to the Cary 100 Bio UV-visible spectrometer).

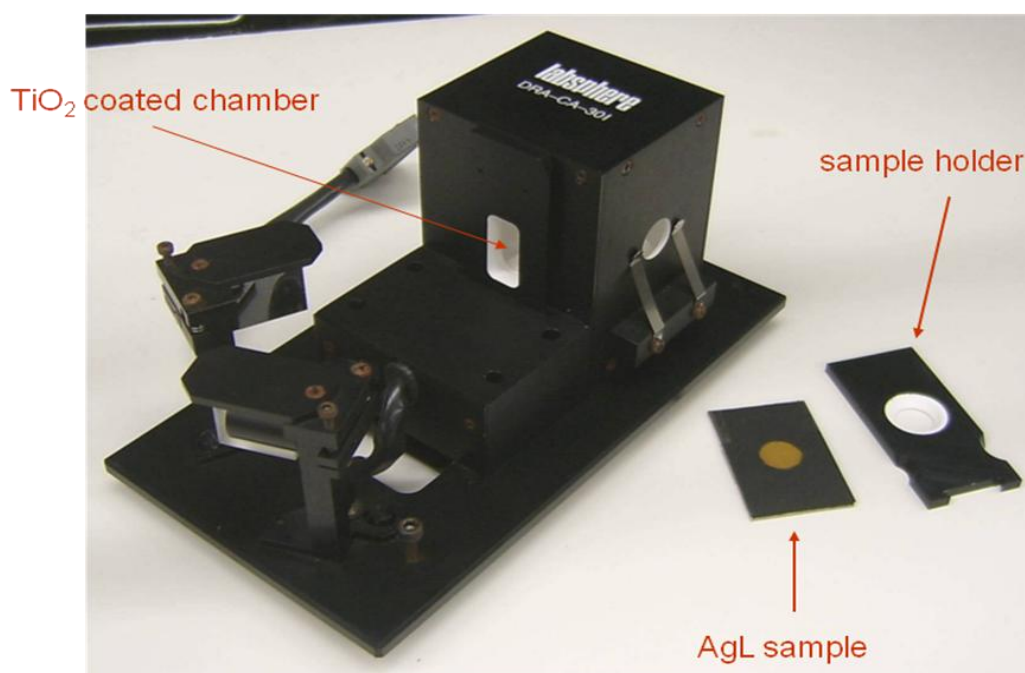

Empirical trials with adjusting of percentage of ingredients for the polymer mixture resulted in optimized the following composition of a truly flowable acrylate composite that is displayed in Figure below along with mass % for each component.

Bisphenol A glycerolate dimethylacrylate, 15%

**Bis-GMA**

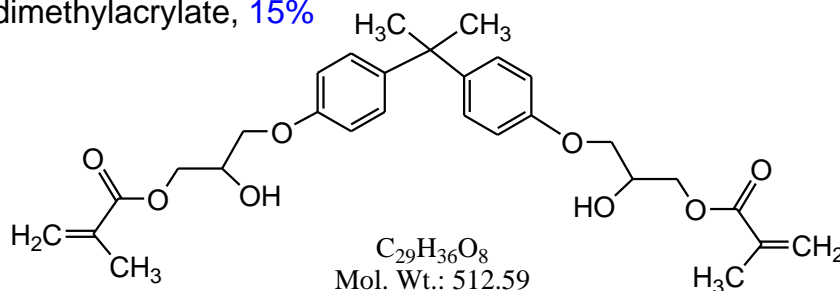

**TEGMA**, 20%

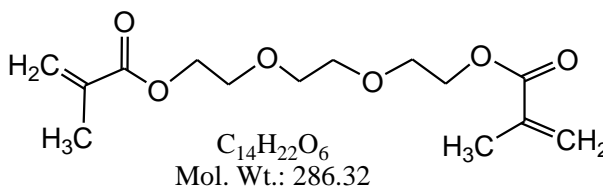

**UDMA**, 20%

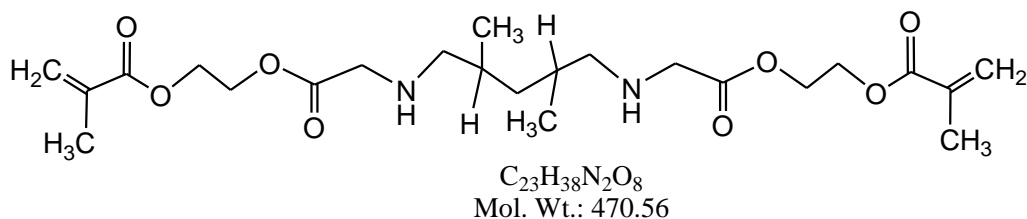

**SiO<sub>2</sub>**, 45%

**EDMAB**, 0.5%

Ethyl-(4-dimethylamino)benzoate

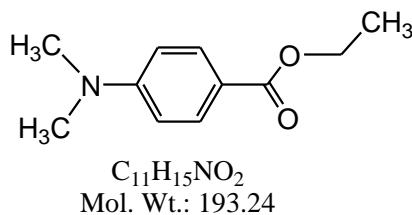

**CPQ**, 0.5%

Camphorquinone

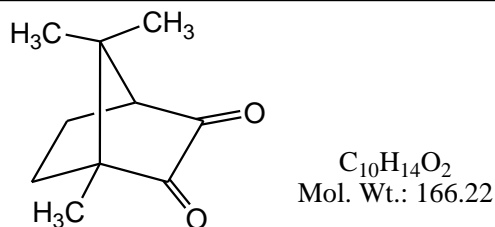

Actual protocol of making composite is the following (using abbreviations in Figure above):

- 1) Add TEGMA and UDMA ingredients into flask and mix them thoroughly for 2 minutes;
- 2) Add Bis-GMA and stir using mechanical stirrer at least 5 minutes at high speed;
- 3) Silica powder was added in 2 g increments and stirred for 5 minutes at high speed between additions of each portion;
- 4) Add dried, powdery Ag(I) cyanoximate and stir for 10 minutes;
- 5) Add CPQ and then separately EDMAB and mixed for 2 min at high speed between additions;
- 6) Final mixing of all components for additional 10 minutes.

All these procedures were carried out in dark and under N<sub>2</sub> protection to prevent premature polymerization reactions and oxidation of susceptible ingredients. The mixture was loaded into the syringe, and then dispensed into the wells in the 96-wells plate as shown in Figure below.

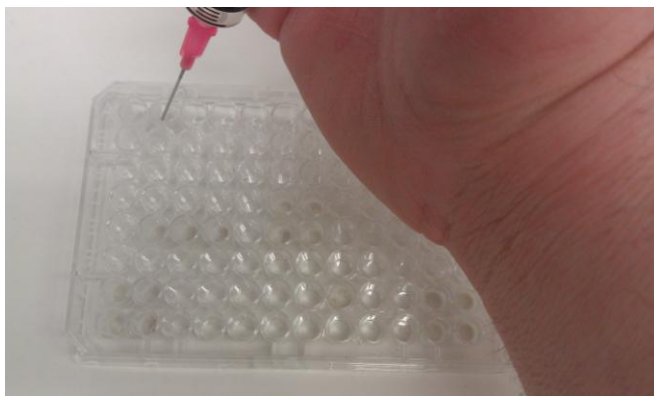

Actual appearance of prepared for microbiological testing polymeric composite (prior to the light-induced polymerization!) can be seen in here:

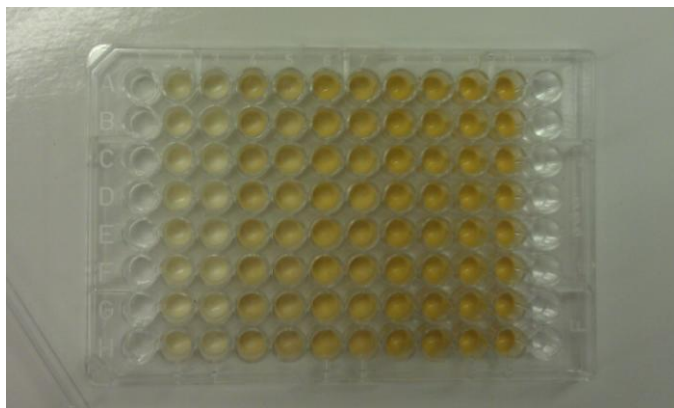

The process of extrusion was not very efficient and could not guarantee sufficient for our work homogeneity. Therefore, we explored several available receipts of dental polymeric composites and modified them to the extent of making the final mixture less viscous, so it should be possible to fill with it a syringe. The latter was used to deliver the mixture into the 96-wells plate that the co-PI Prof. Marianna Patrauchan has selected for the microbiological studies. The Spectrum© curing light source, with output at ~400 nm that is commonly used in dental practice, was selected for cross-linking the polymeric composite (Figure below).

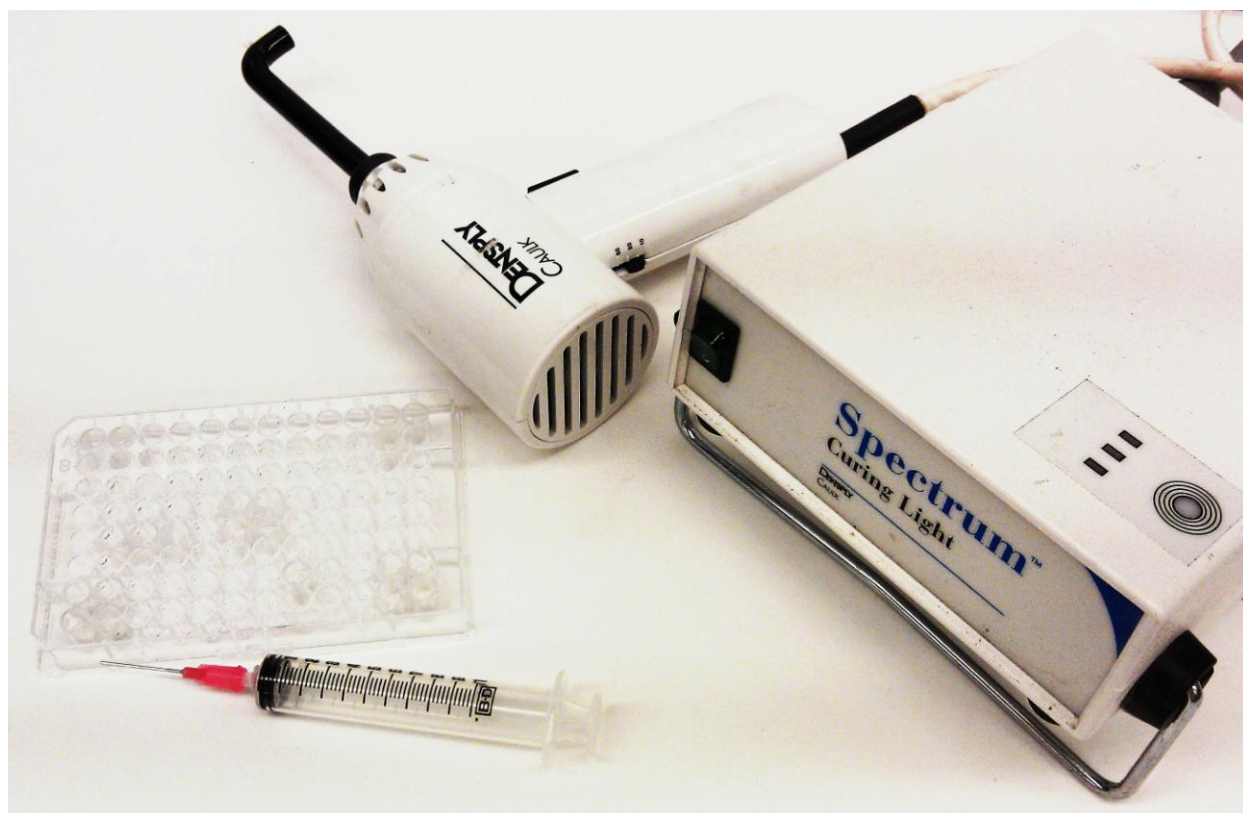

Photographs of 96-wells plates with solid, light-polymerized composite containing embedded, homogenized Ag(I) cyanoximates. A – top view; B – side view.

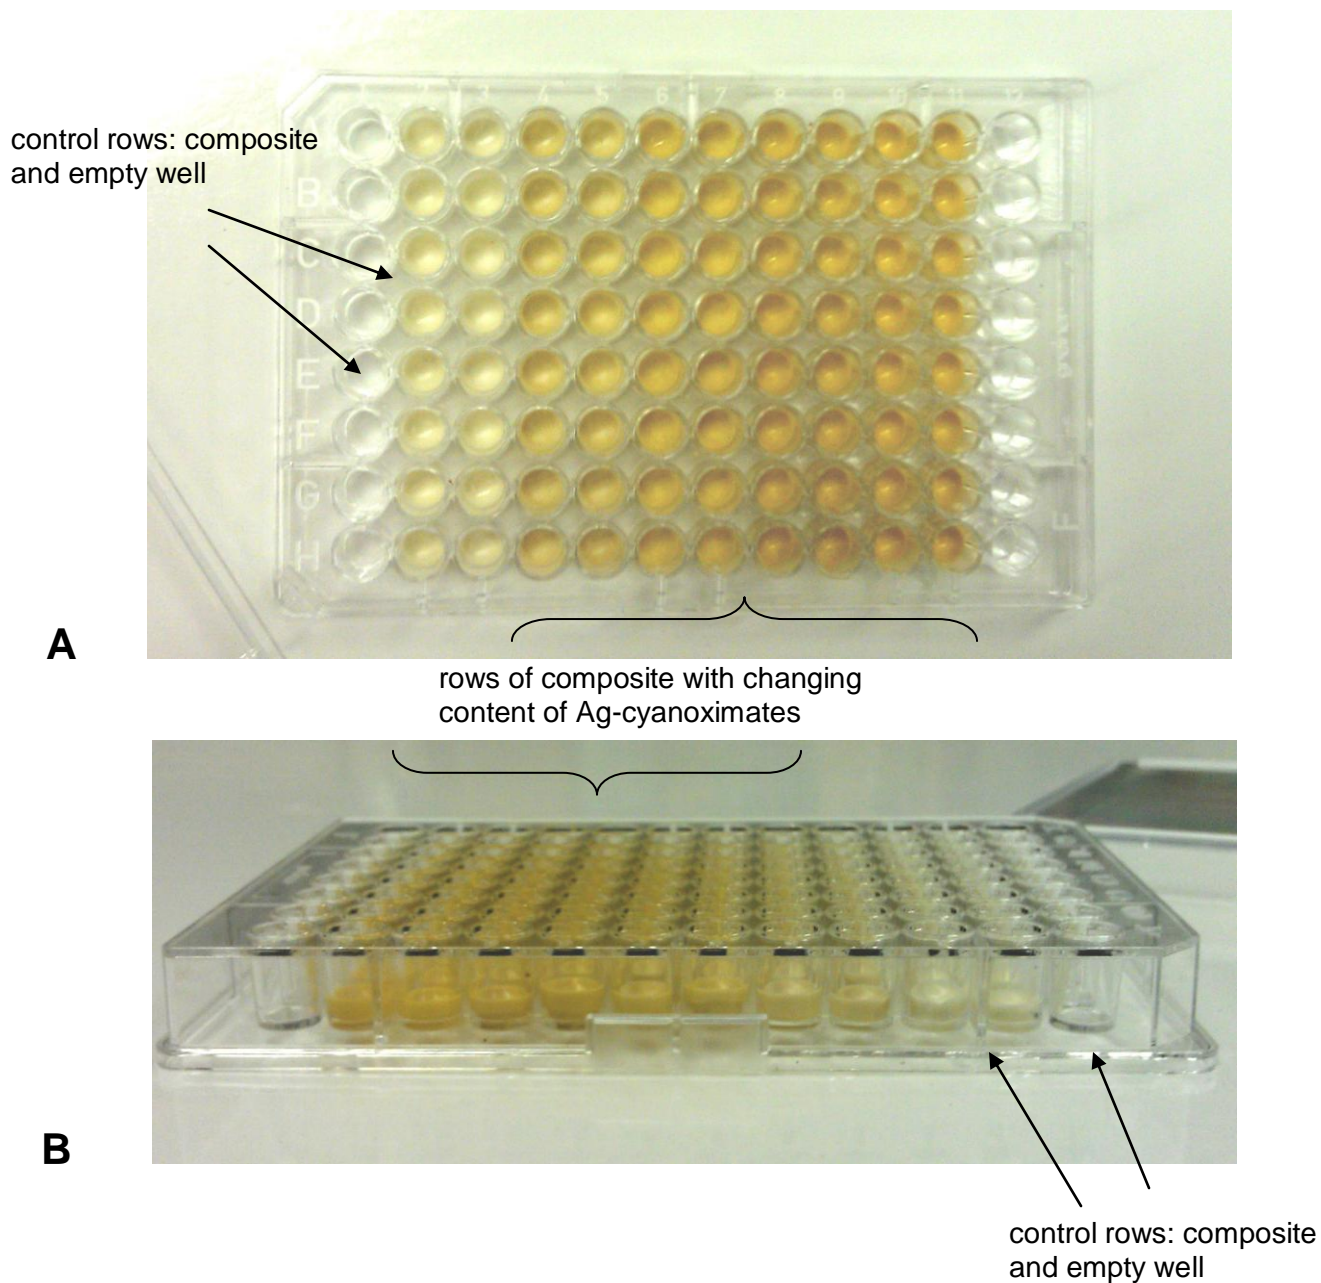

|                                       | Compound <b>1</b> , pre-PiPCO                                                                    | Compound <b>4</b> , pre-MCO                                                              |
|---------------------------------------|--------------------------------------------------------------------------------------------------|------------------------------------------------------------------------------------------|
| Empirical formula                     | C <sub>8</sub> H <sub>12</sub> N <sub>2</sub> O                                                  | C <sub>7</sub> H <sub>10</sub> N <sub>2</sub> O <sub>2</sub>                             |
| Formula weight                        | 152.20                                                                                           | 154.17                                                                                   |
| Temperature                           | 120(2) K                                                                                         | 120(2) K                                                                                 |
| Wavelength                            | 0.71073 Å                                                                                        | 0.71073 Å                                                                                |
| Crystal system                        | Monoclinic                                                                                       | Orthorhombic                                                                             |
| Space group                           | P 2 <sub>1</sub> /c                                                                              | P b c a                                                                                  |
| Unit cell dimensions                  | a = 9.5392(6) Å<br>b = 8.8975(5) Å<br>c = 9.7075(6) Å<br>α = 90°<br>β = 101.6150(10)°<br>γ = 90° | a = 8.8295(5) Å<br>b = 7.0794(4) Å<br>c = 23.7744(14) Å<br>α = 90°<br>α = 90°<br>α = 90° |
| Volume                                | 807.05(8) Å <sup>3</sup>                                                                         | 1486.08(15) Å <sup>3</sup>                                                               |
| Z                                     | 4                                                                                                | 8                                                                                        |
| Density (calculated)                  | 1.253 Mg/m <sup>3</sup>                                                                          | 1.378 Mg/m <sup>3</sup>                                                                  |
| Absorption coefficient                | 0.085 mm <sup>-1</sup>                                                                           | 0.103 mm <sup>-1</sup>                                                                   |
| F(000)                                | 328                                                                                              | 656                                                                                      |
| Crystal size, mm                      | 0.55 · 0.09 · 0.09                                                                               | 0.50 · 0.30 · 0.30                                                                       |
| Θ range for data collection           | 2.18 to 30.28°                                                                                   | 1.71 to 30.50°                                                                           |
| Index ranges                          | -13 ≤ h ≤ 13,<br>-12 ≤ k ≤ 12,<br>-13 ≤ l ≤ 13                                                   | -12 ≤ h ≤ 12<br>-10 ≤ k ≤ 10<br>-33 ≤ l ≤ 33                                             |
| Reflections collected                 | 17903                                                                                            | 20206                                                                                    |
| Independent reflections               | 2413 [R(int) = 0.0446]                                                                           | 2256 [R(int) = 0.0304]                                                                   |
| Completeness to Θ, %                  | 30.28° (99.5 %)                                                                                  | 30.50° (99.4 %)                                                                          |
| Absorption correction                 | Numerical                                                                                        | Numerical                                                                                |
| T <sub>max</sub> and T <sub>min</sub> | 0.9925 and 0.9546                                                                                | 1.000 and 0.9655                                                                         |
| Structure solution                    | Direct methods                                                                                   |                                                                                          |
| Refinement method                     | Full-matrix least-squares on F <sup>2</sup>                                                      |                                                                                          |
| Data/restraints/parameters            | 2413 / 0 / 100                                                                                   | 2256 / 0 / 100                                                                           |
| Goodness-of-fit on F <sup>2</sup>     | 1.465                                                                                            | 1.042                                                                                    |
| Final R indices [I > 2s(I)]           | R1=0.0490, wR2=0.1098                                                                            | R1=0.0355, wR2=0.0870                                                                    |
| R indices (all data)                  | R1=0.0792, wR2=0.1246                                                                            | R1=0.0447, wR2= 0.0935                                                                   |
| Largest diff. peak and hole           | 0.248 / -0.252 e.Å <sup>-3</sup>                                                                 | 0.339 / -0.188 e.Å <sup>-3</sup>                                                         |

Selected bond lengths [ $\text{\AA}$ ] and angles [ $^\circ$ ] in the structures of N-morpholyl-amide acetonitrile (**4**), and N-piperidine-amide-acetonitrile, compound (**1**) – *precursors* for cyanoximes **HMCO** and **HPiPCO** respectively.

| Compound <b>4</b> |            | Compound <b>1</b> |            |
|-------------------|------------|-------------------|------------|
| Bonds:            |            |                   |            |
| C(1)-N(1)         | 1.1422(12) | C(1)-N(1)         | 1.1437(15) |
| C(1)-C(2)         | 1.4636(12) | C(1)-C(2)         | 1.4610(17) |
| C(2)-C(3)         | 1.5281(12) | C(2)-C(3)         | 1.5283(17) |
| C(3)-O(2)         | 1.2263(11) | C(3)-O(1)         | 1.2332(14) |
| C(3)-N(2)         | 1.3507(11) | C(3)-N(2)         | 1.3437(15) |
| C(4)-N(2)         | 1.4628(11) | C(4)-N(2)         | 1.4669(15) |
| C(4)-C(5)         | 1.5181(13) | C(4)-C(5)         | 1.5228(18) |
| C(5)-O(1)         | 1.4319(11) |                   |            |
| C(6)-O(1)         | 1.4285(12) |                   |            |
| C(6)-C(7)         | 1.5178(13) |                   |            |
| C(7)-N(2)         | 1.4619(11) |                   |            |
| Angles:           |            |                   |            |
| N(1)-C(1)-C(2)    | 179.24(10) | N(1)-C(1)-C(2)    | 177.21(15) |
| C(1)-C(2)-C(3)    | 110.08(7)  | C(1)-C(2)-C(3)    | 111.06(10) |
| O(2)-C(3)-N(2)    | 123.40(8)  | O(1)-C(3)-N(2)    | 123.47(11) |
| O(2)-C(3)-C(2)    | 120.64(8)  | O(1)-C(3)-C(2)    | 119.87(10) |
| N(2)-C(3)-C(2)    | 115.96(7)  | N(2)-C(3)-C(2)    | 116.65(11) |
| N(2)-C(4)-C(5)    | 109.06(8)  | N(2)-C(4)-C(5)    | 110.89(10) |
| O(1)-C(5)-C(4)    | 111.58(8)  |                   |            |
| O(1)-C(6)-C(7)    | 111.58(8)  |                   |            |
| N(2)-C(7)-C(6)    | 109.41(8)  |                   |            |
| C(3)-N(2)-C(7)    | 120.31(8)  |                   |            |
| C(3)-N(2)-C(4)    | 126.52(7)  |                   |            |
| C(7)-N(2)-C(4)    | 112.70(7)  |                   |            |
| C(6)-O(1)-C(5)    | 110.38(7)  |                   |            |

The  $^{13}\text{C}\{^1\text{H}\}$  NMR spectrum (and numbering) of **1** in  $\text{dms}\text{-d}_6$ .

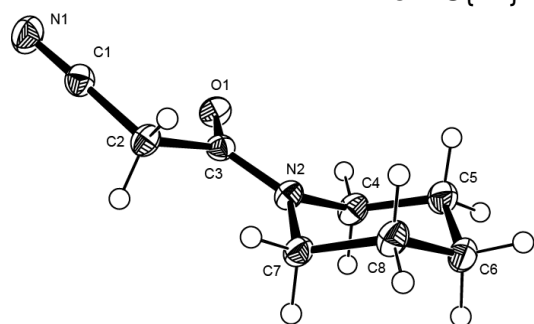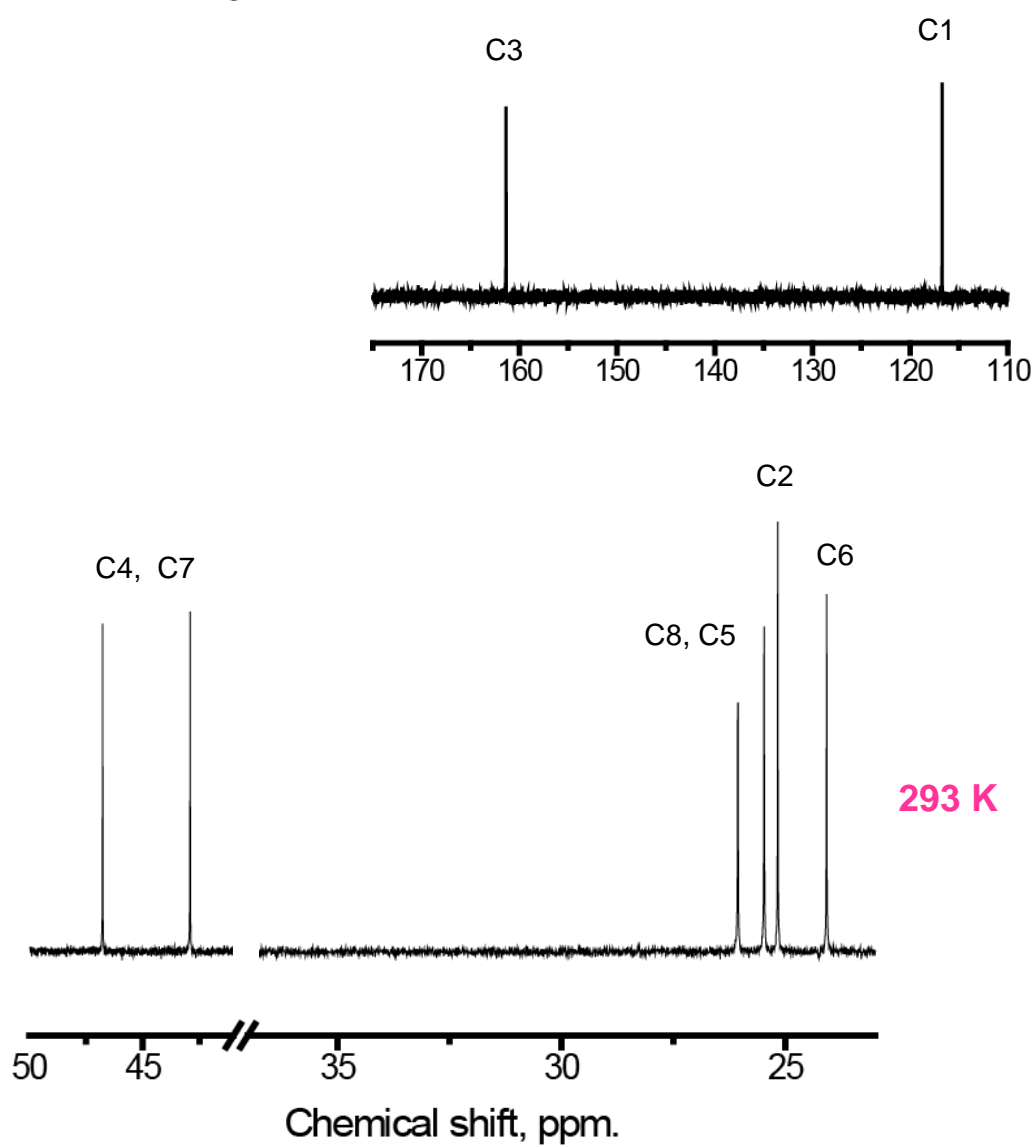

The  $^{13}\text{C}\{^1\text{H}\}$  NMR spectrum (and numbering) of **4** in  $\text{dms}\text{-d}_6$ .

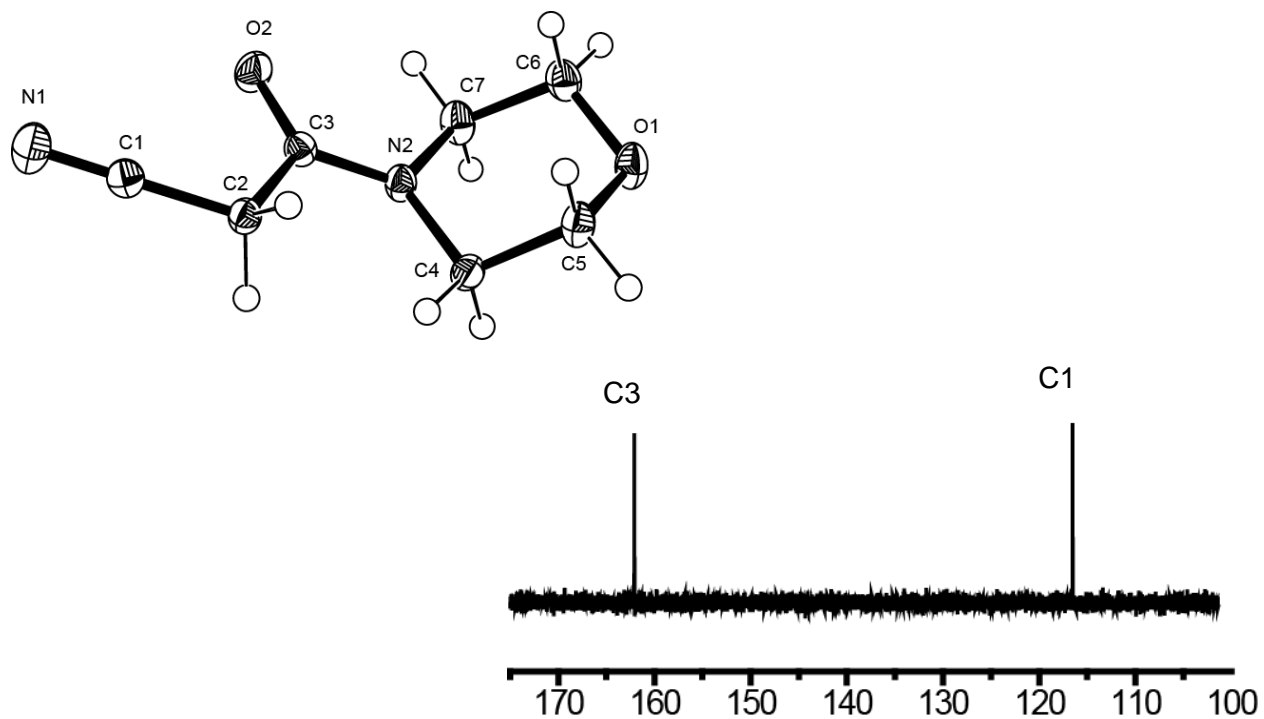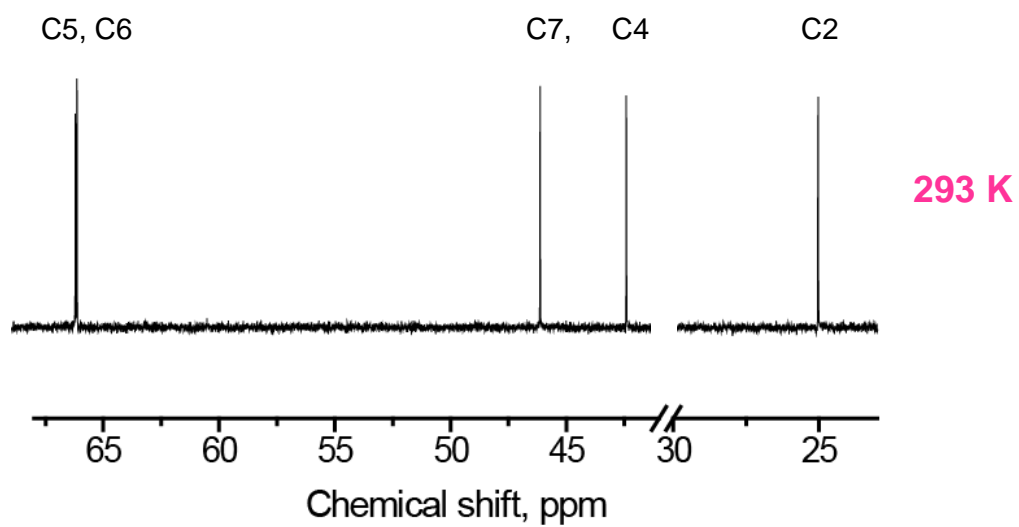

## checkCIF/PLATON report (publication check)

No syntax errors found.  
Please wait while processing ....

[CIF dictionary](#)  
[Interpreting this report](#)

**Datablock: crystal-1**

**prePiPCO (1)**

---

|                 |                                           |                    |
|-----------------|-------------------------------------------|--------------------|
| Bond precision: | C-C = 0.0018 Å                            | Wavelength=0.71073 |
| Cell:           | a=9.5392(6)    b=8.8975(5)    c=9.7075(6) |                    |
|                 | alpha=90    beta=101.615(1)    gamma=90   |                    |
| Temperature:    | 120 K                                     |                    |

  

|                        | Calculated    | Reported                        |
|------------------------|---------------|---------------------------------|
| Volume                 | 807.05(8)     | 807.05(8)                       |
| Space group            | P 21/c        | P 21/c                          |
| Hall group             | -P 2ybc       | -P 2ybc                         |
| Moiety formula         | C8 H12 N2 O   | C8 H12 N2 O                     |
| Sum formula            | C8 H12 N2 O   | C8 H12 N2 O                     |
| Mr                     | 152.20        | 152.20                          |
| Dx, g cm <sup>-3</sup> | 1.253         | 1.253                           |
| Z                      | 4             | 4                               |
| Mu (mm <sup>-1</sup> ) | 0.085         | 0.085                           |
| F000                   | 328.0         | 328.0                           |
| F000'                  | 328.12        |                                 |
| h, k, lmax             | 13, 12, 13    | 13, 12, 13                      |
| Nref                   | 2426          | 2413                            |
| Tmin, Tmax             | 0.991, 0.992  | 0.955, 0.993                    |
| Tmin'                  | 0.954         |                                 |
| Correction method=     | NUMERICAL     |                                 |
| Data completeness=     | 0.995         | Theta(max)= 30.280              |
| R(reflections)=        | 0.0490( 1686) | wR2(reflections)= 0.1246( 2413) |
| S =                    | 1.465         | Npar= 100                       |

---

The following ALERTS were generated. Each ALERT has the format  
**test-name\_ALERT\_alert-type\_alert-level**.  
Click on the hyperlinks for more details of the test.

### ● Alert level C

[PLAT230 ALERT 2 C](#) Hirshfeld Test Diff for    C1 --    C2 ..    6.21 su

### ● Alert level G

[PLAT710 ALERT 4 G](#) Delete 1-2-3 or 2-3-4 Linear Torsion Angle ... #    1

|    |     |     |     |       |      |       |       |       |       |
|----|-----|-----|-----|-------|------|-------|-------|-------|-------|
| N1 | -C1 | -C2 | -C3 | 18.00 | 0.00 | 1.555 | 1.555 | 1.555 | 1.555 |
|----|-----|-----|-----|-------|------|-------|-------|-------|-------|

- 0 **ALERT level A** = In general: serious problem  
0 **ALERT level B** = Potentially serious problem  
1 **ALERT level C** = Check and explain

1 **ALERT level G** = General alerts; check

0 ALERT type 1 CIF construction/syntax error, inconsistent or missing data

1 ALERT type 2 Indicator that the structure model may be wrong or deficient

0 ALERT type 3 Indicator that the structure quality may be low

1 ALERT type 4 Improvement, methodology, query or suggestion

0 ALERT type 5 Informative message, check

---

**PLATON version of 22/10/2010; check.def file version of 11/10/2010**

## Datablock crystal-1 - ellipsoid plot

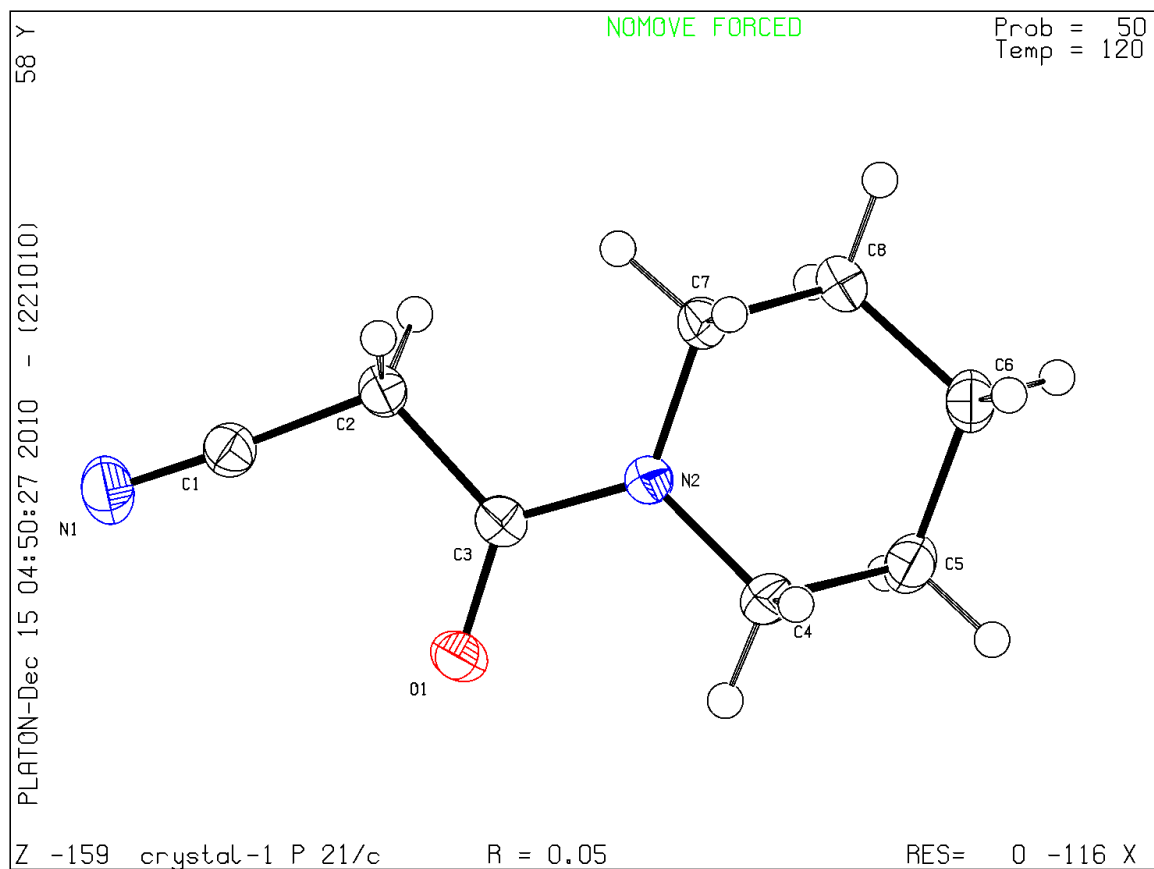

---

**checkCIF/PLATON (full publication check)**

---

*Structure factors have been supplied for datablock(s) I*

THIS REPORT IS FOR GUIDANCE ONLY. IF USED AS PART OF A REVIEW PROCEDURE FOR PUBLICATION, IT SHOULD NOT REPLACE THE EXPERTISE OF AN EXPERIENCED CRYSTALLOGRAPHIC REFEREE.

No syntax errors found.

Please wait while processing ....

[CIF dictionary](#)  
[Interpreting this](#)

[report](#)

[Structure factor report](#)

---

**Datablock: I****preMCO (4)**

---

Bond precision: C-C = 0.0013 Å Wavelength=0.71073

Cell: a=8.8295 (5) b=7.0794 (4) c=23.7744 (14)

alpha=90 beta=90 gamma=90

Temperature: 120 K

|                        | Calculated   | Reported     |
|------------------------|--------------|--------------|
| Volume                 | 1486.08 (15) | 1486.08 (15) |
| Space group            | P b c a      | P b c a      |
| Hall group             | -P 2ac 2ab   | -P 2ac 2ab   |
| Moiety formula         | C7 H10 N2 O2 | C7 H10 N2 O2 |
| Sum formula            | C7 H10 N2 O2 | C7 H10 N2 O2 |
| Mr                     | 154.17       | 154.17       |
| Dx, g cm <sup>-3</sup> | 1.378        | 1.378        |
| Z                      | 8            | 8            |
| Mu (mm <sup>-1</sup> ) | 0.103        | 0.103        |
| F000                   | 656.0        | 656.0        |
| F000'                  | 656.31       |              |
| h, k, lmax             | 12, 10, 33   | 12, 10, 33   |
| Nref                   | 2268         | 2256         |
| Tmin, Tmax             | 0.964, 0.970 | 0.965, 1.000 |
| Tmin'                  | 0.950        |              |

Correction method= NUMERICAL

Data completeness= 0.995 Theta (max)= 30.500

R(reflections)= 0.0355 ( 1871) wR2(reflections)= 0.0935 ( 2256)

S = 1.042 Npar= 100

---

The following ALERTS were generated. Each ALERT has the format

**test-name\_ALERT\_alert-type\_alert-level.**

Click on the hyperlinks for more details of the test.

### ● Alert level C

[PLAT911 ALERT 3 C](#) Missing # FCF Refl Between THmin & STh/L= 0.600 8

### ● Alert level G

[PLAT005 ALERT 5 G](#) No \_iucr\_refine\_instructions\_details in the CIF ? Do !  
[PLAT230 ALERT 2 G](#) Hirshfeld Test Diff for C1 -- C2 .. 7.8 su  
[PLAT912 ALERT 4 G](#) Missing # of FCF Reflections Above STh/L= 0.600 5

0 **ALERT level A** = Most likely a serious problem - resolve or explain  
0 **ALERT level B** = A potentially serious problem, consider carefully  
1 **ALERT level C** = Check. Ensure it is not caused by an omission or oversight  
3 **ALERT level G** = General information/check it is not something unexpected

0 ALERT type 1 CIF construction/syntax error, inconsistent or missing data  
1 ALERT type 2 Indicator that the structure model may be wrong or deficient  
1 ALERT type 3 Indicator that the structure quality may be low  
1 ALERT type 4 Improvement, methodology, query or suggestion  
1 ALERT type 5 Informative message, check

PLATON version of 01/06/2013; check.def file version of 24/05/2013

## Datablock I - ellipsoid plot

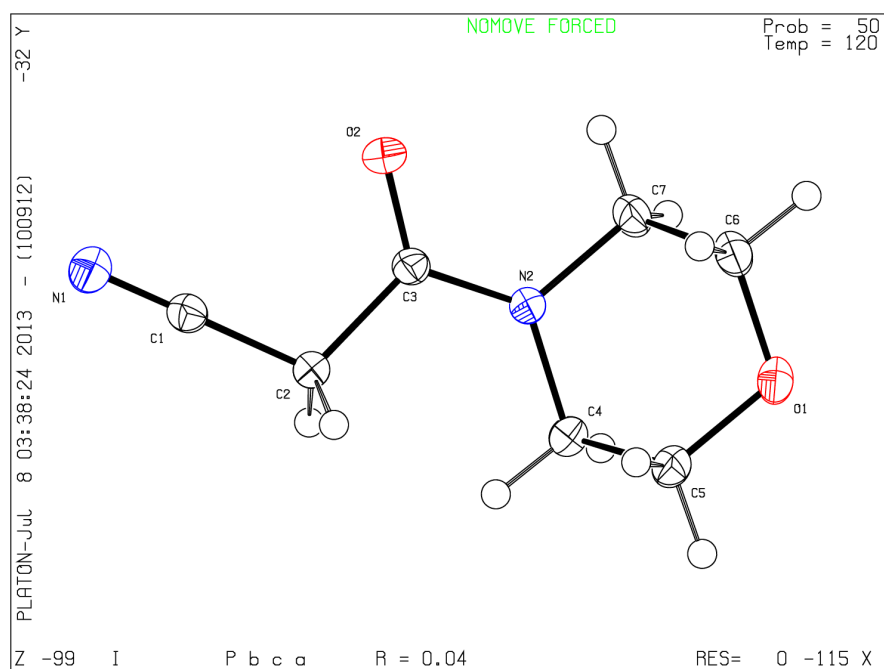

Packing diagram in the structure of HMCO (**5**): **A** – H-bonded chain of molecules (shown view along *b* direction); **B** – several unit cells viewed along *c* direction. The shearing plane of the crystal indicated with green arrow.

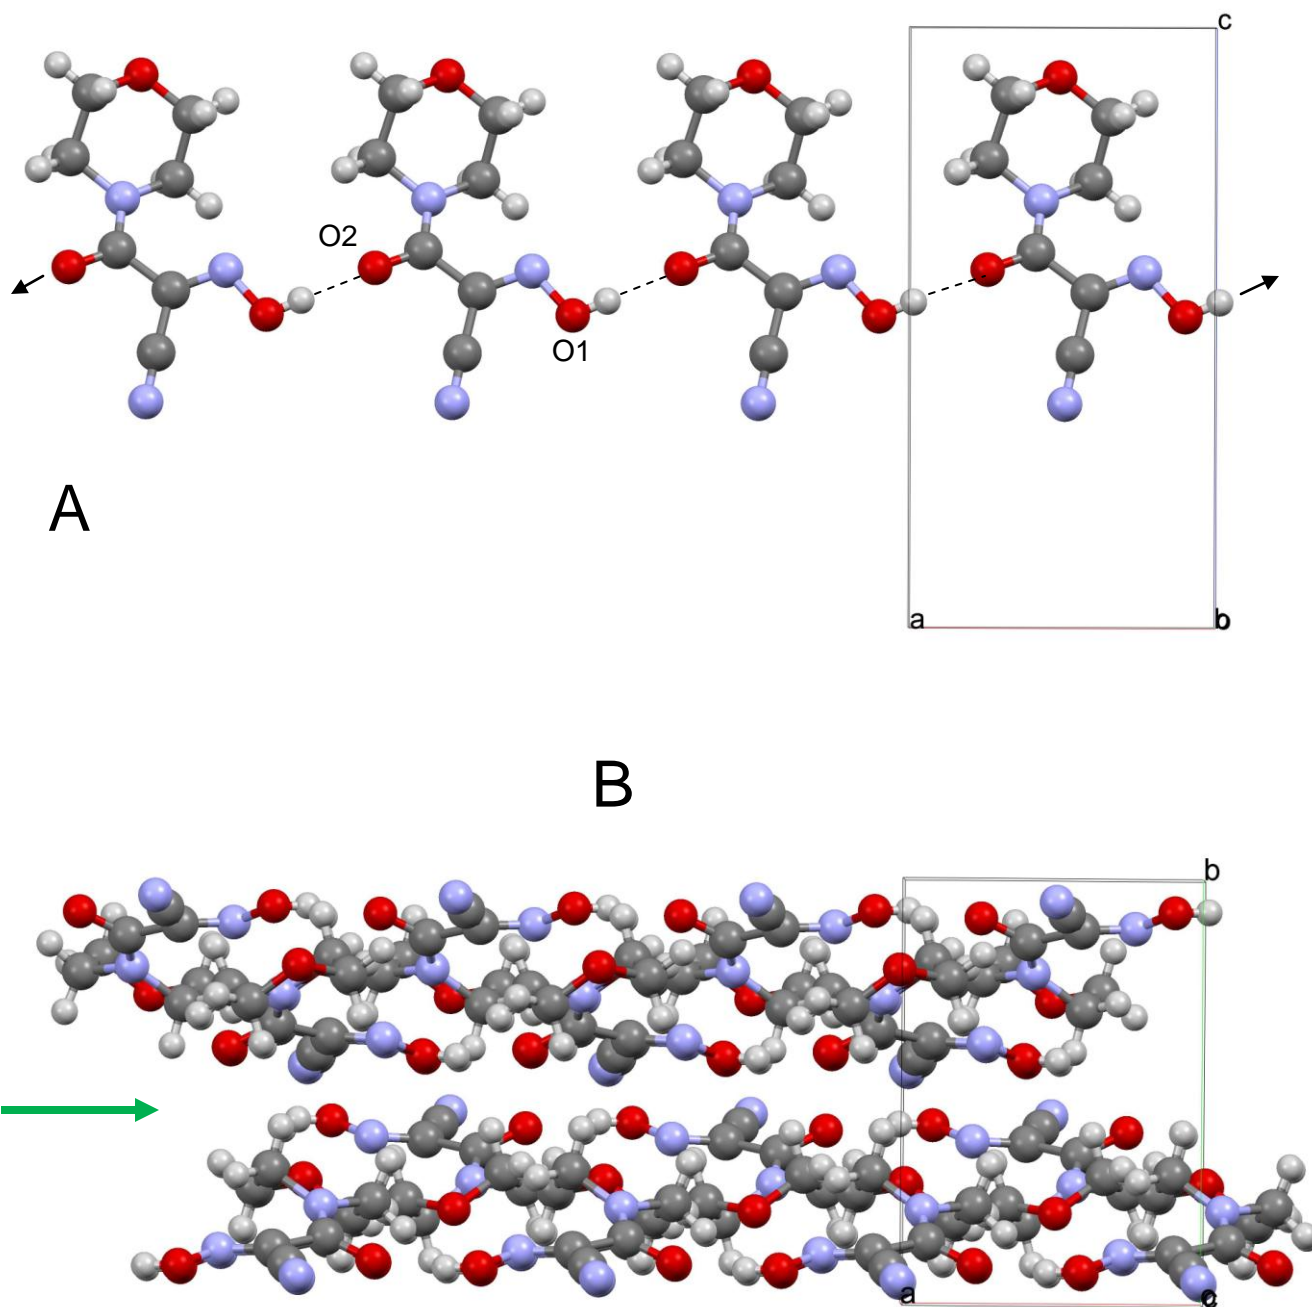

Packing diagram in the structure of HPiPCO (**2**): **A** – H-bonded chain of molecules (shown view along *c* direction); **B** – prospective view of several unit cells. The shearing plane of the crystal along *oa* direction is indicated with green arrow.

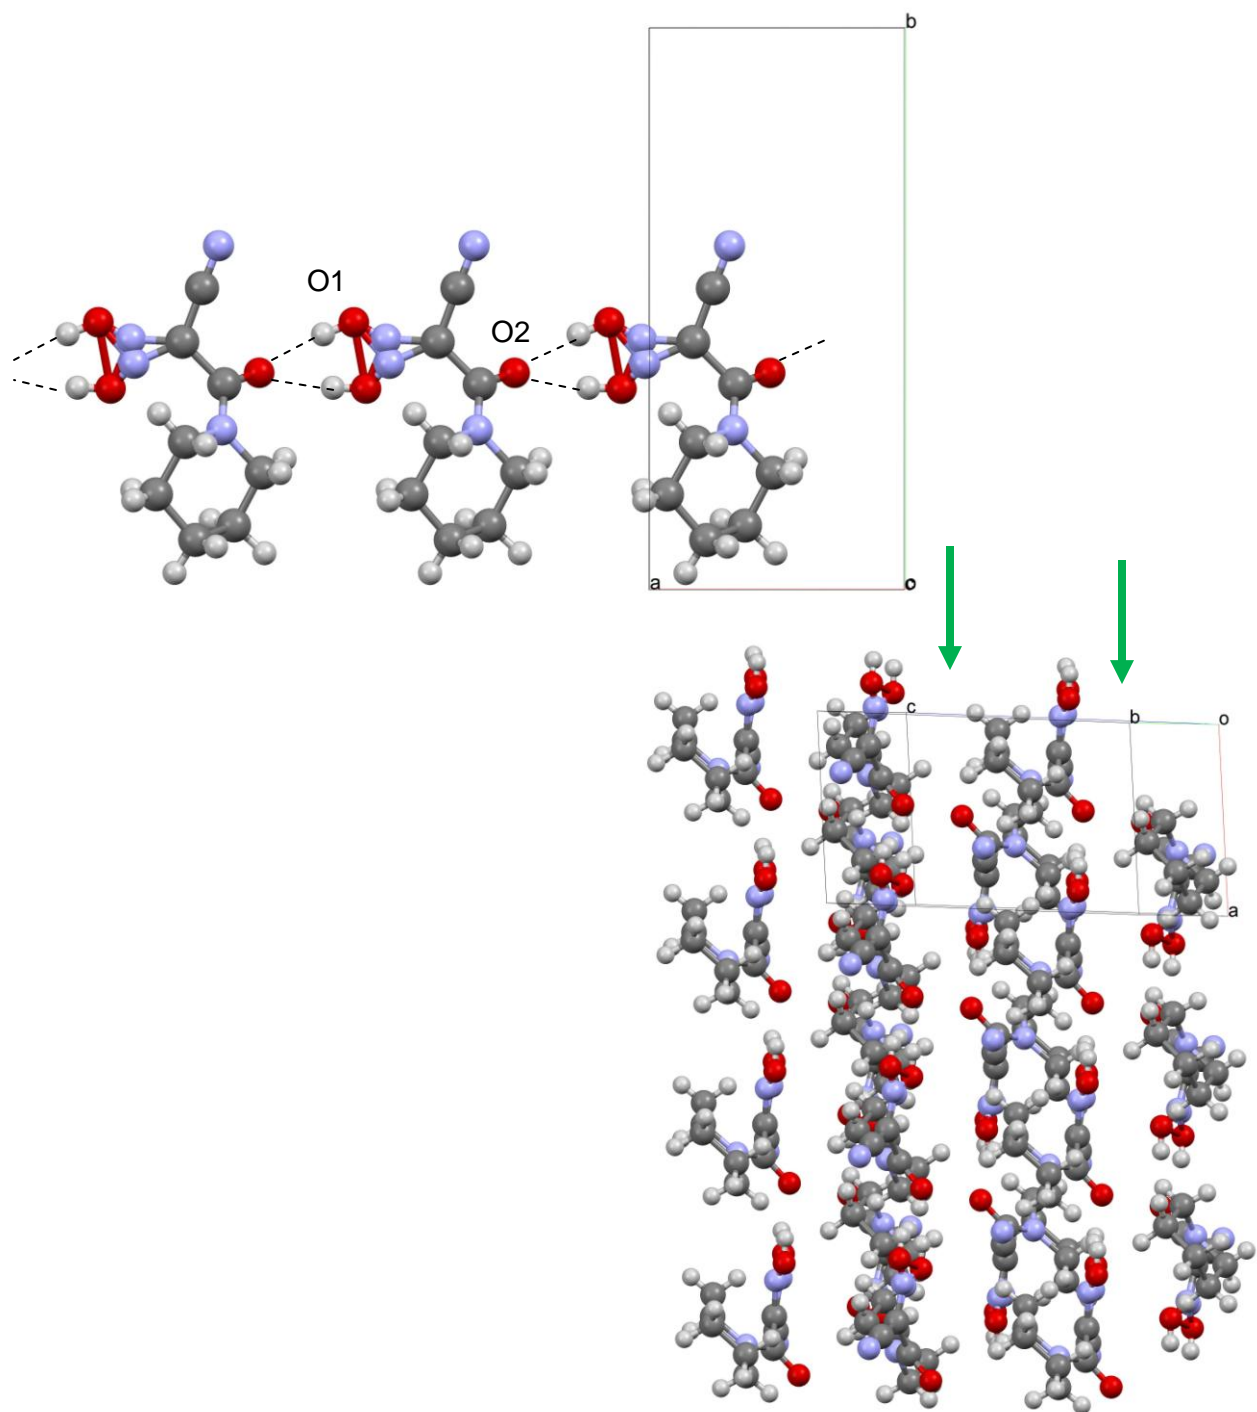

### Planes in the structures of amide-cyanoxime 5.

Selected fragments of the HMCO (**5**) structure are shown. **A** – the explanation for non-equivalence of carbon atoms in the  $^{13}\text{C}\{^1\text{H}\}$  NMR spectrum is in the absence of rotation around C3-N3 amide bond; hence, all carbon atoms in both cyanoximes have different environment due to their different position relative to the C=O bond.

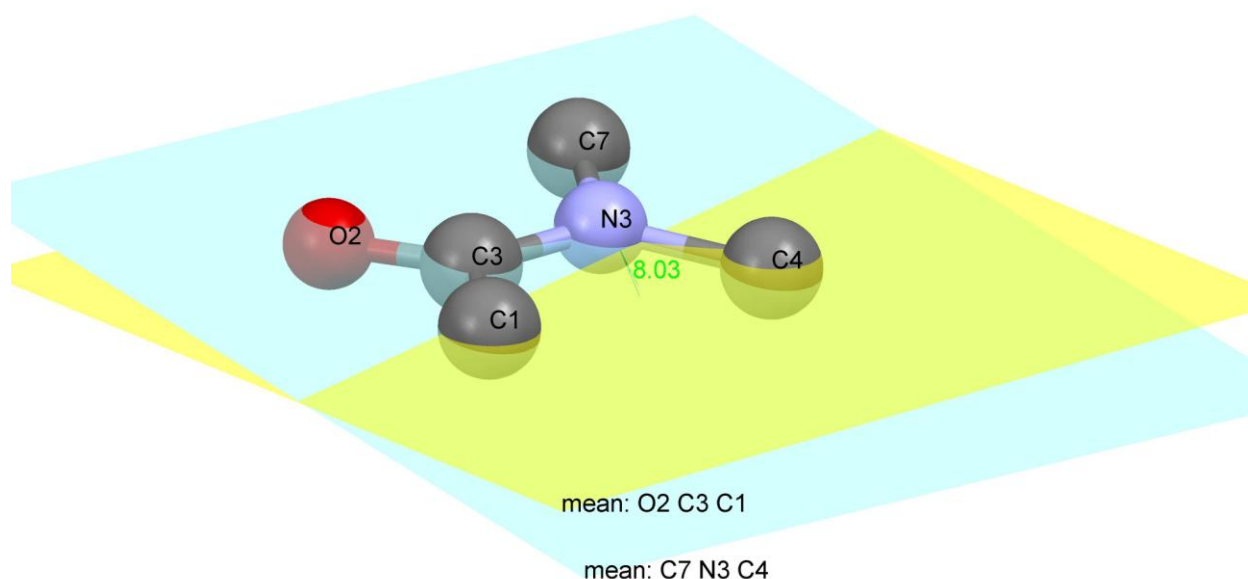

**B** - The ligand's core is not planar as well: the dihedral angle between the cyanoxime and amide fragments is shown ( $29.09^\circ$ ). H-atoms are omitted for clarity.

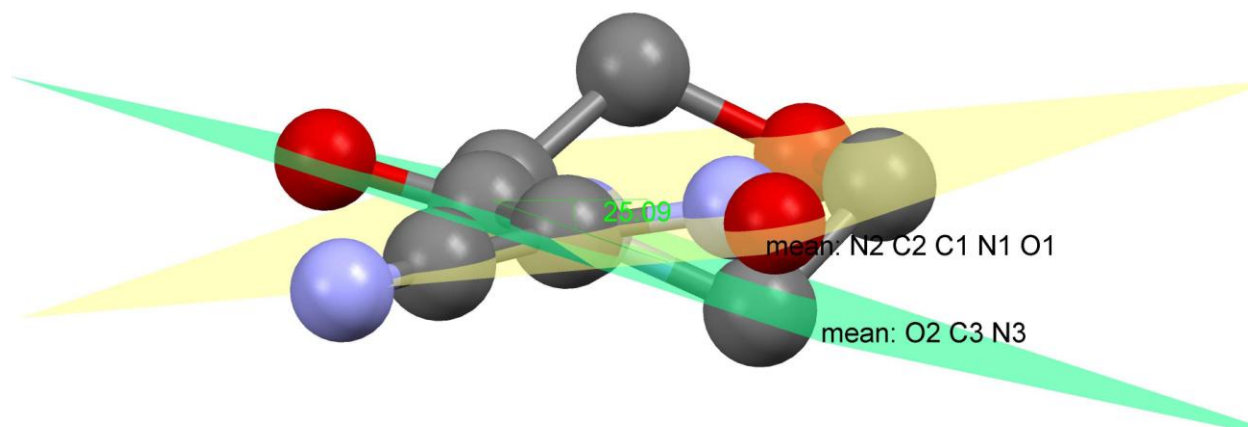

## Planes in the structures of amide-cyanoxime 2.

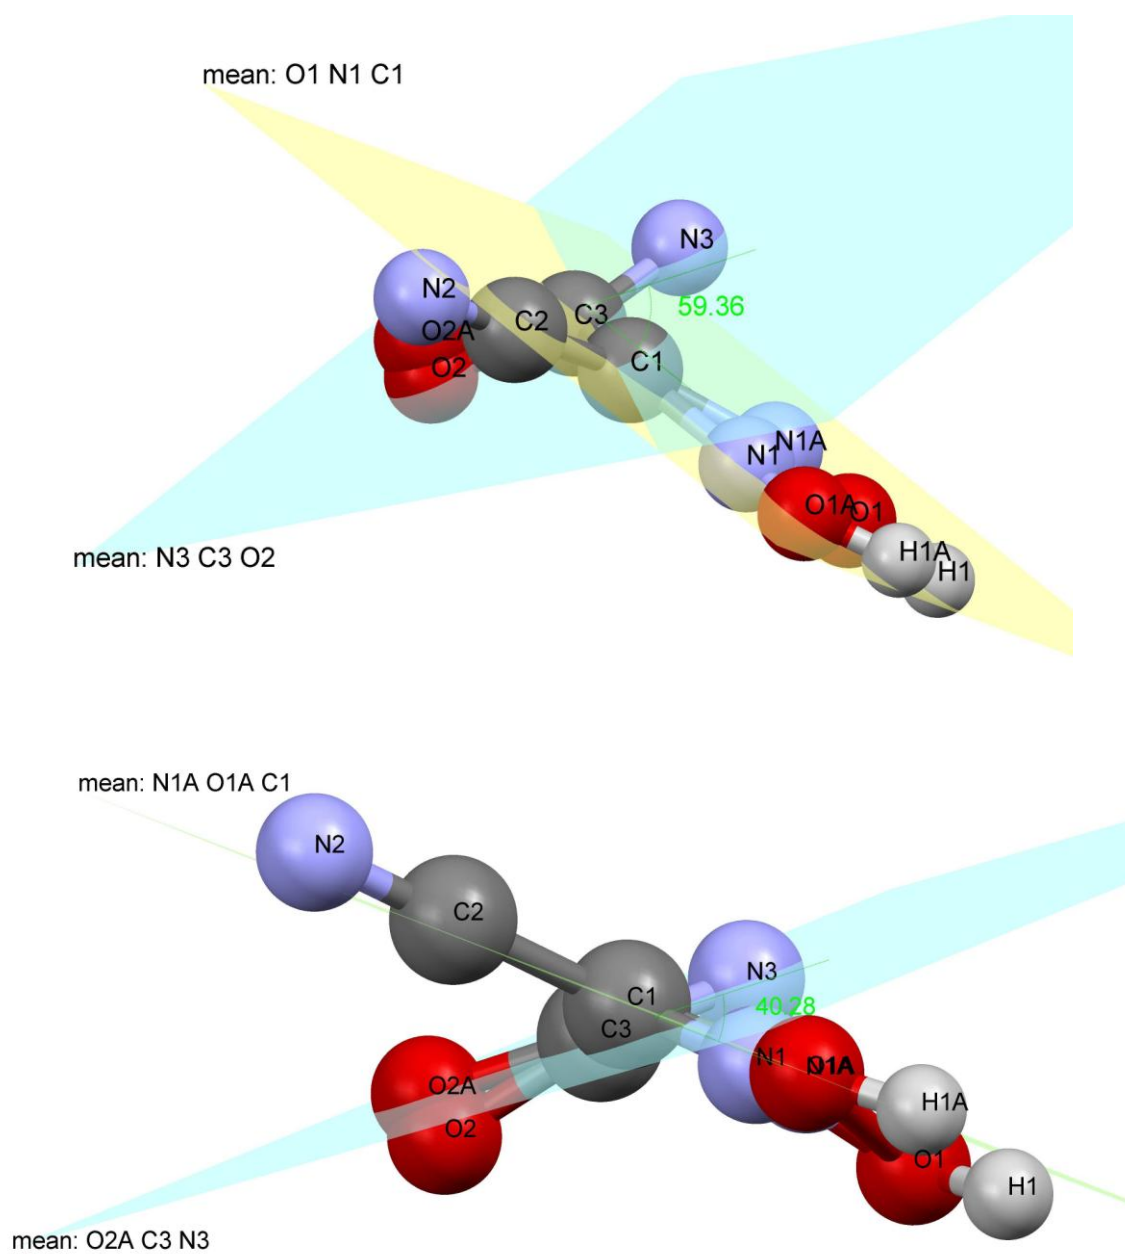

## Planes in the structures of amide-cyanoxime 2.

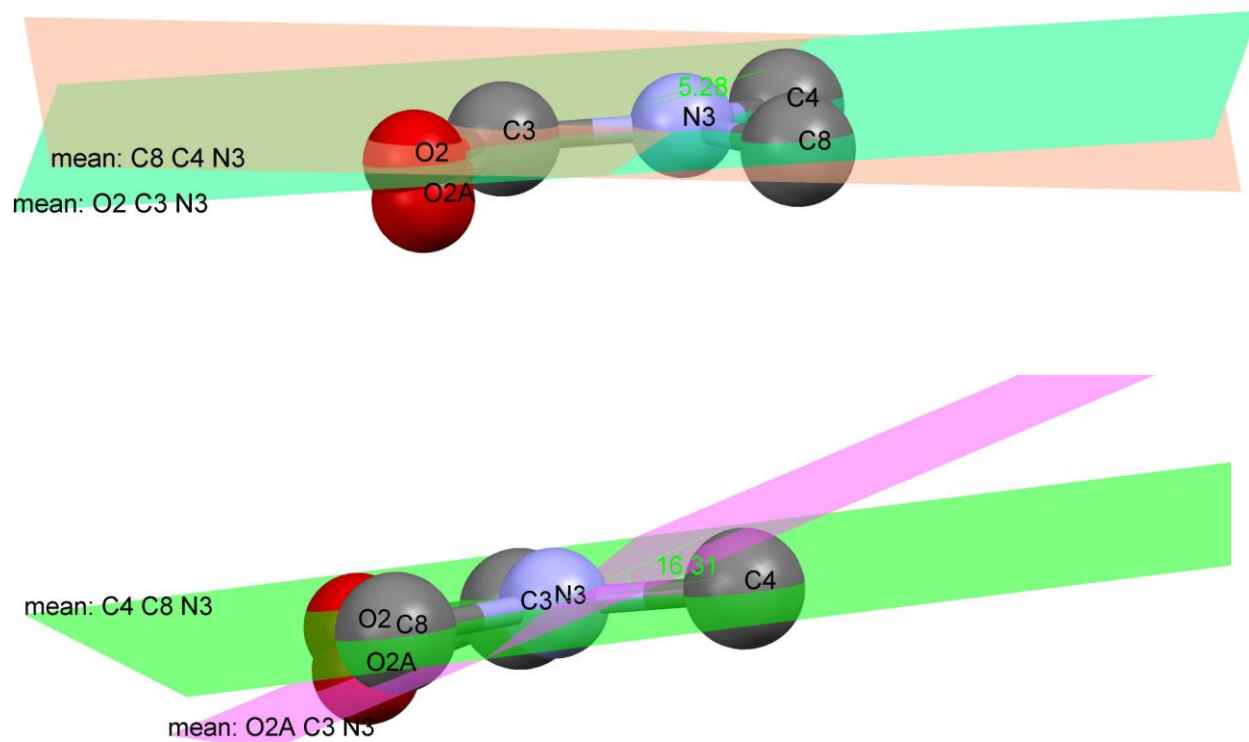

---

**Hydrogen bonding for cyanoxime 5 (HMCO),**

---

| D-H...A            | d(D-H) | d(H...A) | d(D...A)   | <(DHA) |
|--------------------|--------|----------|------------|--------|
| O(1)-H(1)...O(2)#1 | 0.84   | 1.77     | 2.6028(13) | 173.4  |

---

Symmetry transformations used to generate equivalent atoms:

#1 x+1,y,z

and

**cyanoxime 2 (HPipCO) [ $\text{\AA}$  and  $^\circ$ ]**

---

| D-H...A               | d(D-H)  | d(H...A) | d(D...A)  | <(DHA) |
|-----------------------|---------|----------|-----------|--------|
| O(1A)-H(1A)...O(2A)#1 | 0.84    | 1.67     | 2.500(19) | 167.7  |
| O(1A)-H(1A)...O(2)#1  | 0.84    | 1.90     | 2.722(11) | 164.6  |
| O(1)-H(1)...O(2A)#1   | 0.98(7) | 1.58(7)  | 2.55(2)   | 173(6) |
| O(1)-H(1)...O(2)#1    | 0.98(7) | 1.74(7)  | 2.714(12) | 177(6) |

---

Symmetry transformations used to generate equivalent atoms:

#1 x-1,y,z

## checkCIF/PLATON (full publication check)

*Structure factors have been supplied for datablock(s) I*

THIS REPORT IS FOR GUIDANCE ONLY. IF USED AS PART OF A REVIEW PROCEDURE FOR PUBLICATION, IT SHOULD NOT REPLACE THE EXPERTISE OF AN EXPERIENCED CRYSTALLOGRAPHIC REFEREE.

No syntax errors found.  
Please wait while processing ....  
[Structure factor report](#)

[CIF dictionary](#)  
[Interpreting this report](#)

### Datablock: I

### HPipCO (2)

Bond precision: C-C = 0.0042 Å Wavelength=0.71073

Cell: a=6.3640 (9) b=13.8997 (19) c=10.3185 (14)

alpha=90 beta=95.059 (2) gamma=90

Temperature: 120 K

|                        | Calculated   | Reported     |
|------------------------|--------------|--------------|
| Volume                 | 909.2 (2)    | 909.2 (2)    |
| Space group            | P 21/c       | P 21/c       |
| Hall group             | -P 2ybc      | -P 2ybc      |
| Moiety formula         | C8 H11 N3 O2 | C8 H11 N3 O2 |
| Sum formula            | C8 H11 N3 O2 | C8 H11 N3 O2 |
| Mr                     | 181.20       | 181.20       |
| Dx, g cm <sup>-3</sup> | 1.324        | 1.324        |
| Z                      | 4            | 4            |
| Mu (mm <sup>-1</sup> ) | 0.098        | 0.098        |
| F000                   | 384.0        | 384.0        |
| F000'                  | 384.17       |              |
| h, k, lmax             | 8, 19, 14    | 8, 19, 14    |
| Nref                   | 2526         | 2512         |
| Tmin, Tmax             | 0.971, 0.981 | 0.792, 1.000 |
| Tmin'                  | 0.971        |              |

Correction method= NUMERICAL

Data completeness= 0.994 Theta(max)= 29.490

R(reflections)= 0.0500 ( 1905) wR2(reflections)= 0.1177 ( 2512)

S = 1.039 Npar= 145

The following ALERTS were generated. Each ALERT has the format

**test-name\_ALERT\_alert-type\_alert-level.**

Click on the hyperlinks for more details of the test.

### ● Alert level C

CRYSC01\_ALERT\_1\_C The word below has not been recognised as a standard identifier: coloreless

CRYSC01\_ALERT\_1\_C No recognised colour has been given for crystal colour.

PLAT340\_ALERT\_3\_C Low Bond Precision on C-C Bonds ..... 0.0042 Ang.  
 PLAT906\_ALERT\_3\_C Large K value in the Analysis of Variance ..... 4.271  
 PLAT911\_ALERT\_3\_C Missing # FCF Refl Between THmin & STh/L= 0.600 2

---

## ●Alert level G

PLAT002\_ALERT\_2\_G Number of Distance or Angle Restraints on AtSite 6  
 PLAT005\_ALERT\_5\_G No \_iucr\_refine\_instructions\_details in the CIF ? Do !  
 PLAT007\_ALERT\_5\_G Note: Number of Unrefined Donor-H Atoms ..... 1  
 PLAT301\_ALERT\_3\_G Note: Main Residue Disorder ..... 23 %  
 PLAT311\_ALERT\_2\_G Isolated Disordered Oxygen Atom (No H's ?) ..... O2  
 PLAT710\_ALERT\_4\_G Delete 1-2-3 or 2-3-4 Linear Torsion Angle ... # 1  
     N1 -C1 -C2 -N2 17.00 0.00 1.555 1.555 1.555 1.555

### And 2 other PLAT710 Alerts

Less ...

PLAT710\_ALERT\_4\_G Delete 1-2-3 or 2-3-4 Linear Torsion Angle ... # 2

    N1A -C1 -C2 -N2 18.00 0.00 1.555 1.555 1.555 1.555

PLAT710\_ALERT\_4\_G Delete 1-2-3 or 2-3-4 Linear Torsion Angle ... # 3

    C3 -C1 -C2 -N2 -4.00 39.00 1.555 1.555 1.555 1.555

PLAT764\_ALERT\_4\_G Overcomplete CIF Bond List Detected (Rep/Expd) . 1.14 Ratio  
 PLAT779\_ALERT\_4\_G Suspect or Irrelevant (Bond) Angle in CIF .... # 1  
     N1 -C1 -N1A 1.555 1.555 1.555 26.60 Deg.  
 PLAT779\_ALERT\_4\_G Suspect or Irrelevant (Bond) Angle in CIF .... # 8  
     O2A -C3 -O2 1.555 1.555 1.555 14.10 Deg.  
 PLAT811\_ALERT\_5\_G No ADDSYM Analysis: Too Many Excluded Atoms .... ! Info  
 PLAT860\_ALERT\_3\_G Note: Number of Least-Squares Restraints ..... 4  
 PLAT912\_ALERT\_4\_G Missing # of FCF Reflections Above STh/L= 0.600 10

---

0 **ALERT level A** = Most likely a serious problem - resolve or explain  
 0 **ALERT level B** = A potentially serious problem, consider carefully  
 5 **ALERT level C** = Check. Ensure it is not caused by an omission or oversight

14 **ALERT level G** = General information/check it is not something unexpected

2 ALERT type 1 CIF construction/syntax error, inconsistent or missing data  
 2 ALERT type 2 Indicator that the structure model may be wrong or deficient

5 ALERT type 3 Indicator that the structure quality may be low  
 7 ALERT type 4 Improvement, methodology, query or suggestion  
 3 ALERT type 5 Informative message, check

---

PLATON version of 01/06/2013; check.def file version of 24/05/2013

## Datablock I - ellipsoid plot

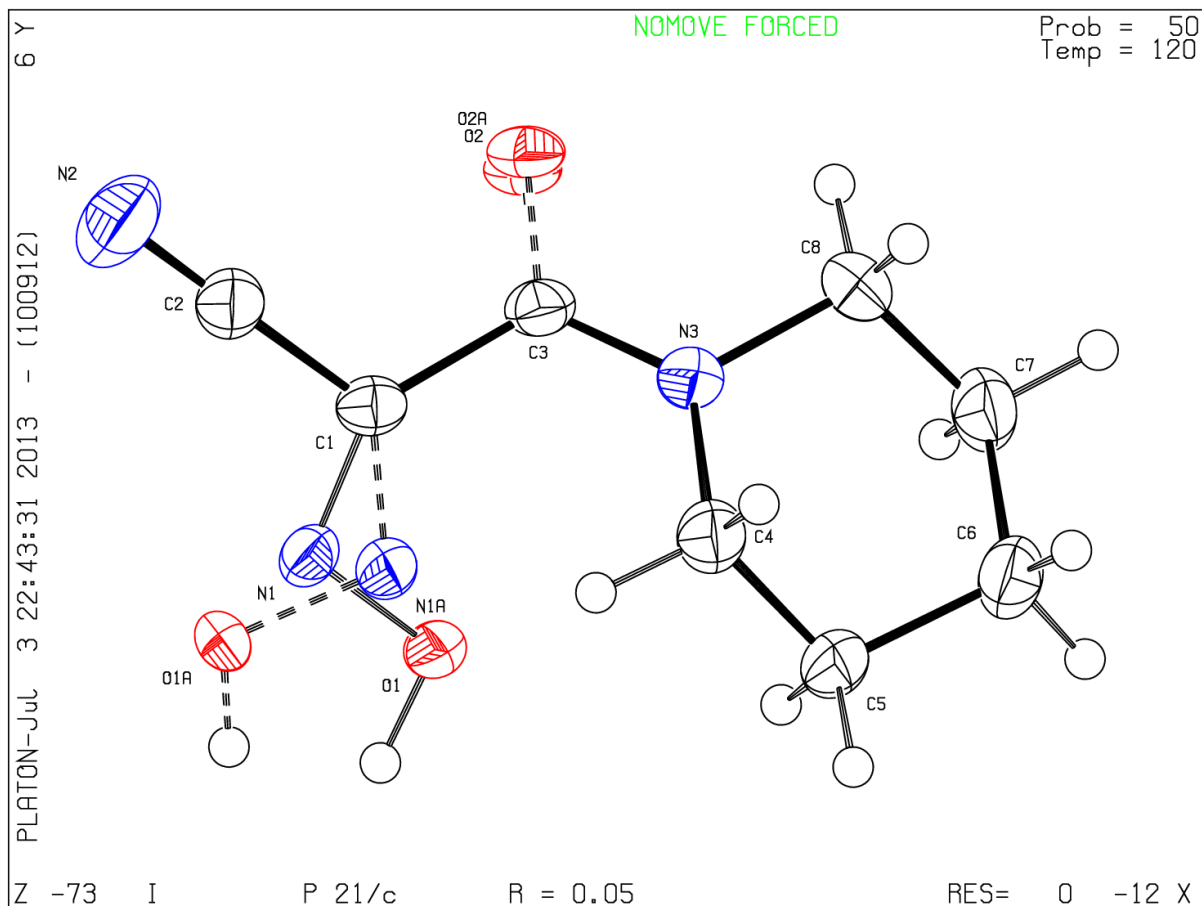

## checkCIF/PLATON (full publication check)

*Structure factors have been supplied for datablock(s) I*

THIS REPORT IS FOR GUIDANCE ONLY. IF USED AS PART OF A REVIEW PROCEDURE FOR PUBLICATION, IT SHOULD NOT REPLACE THE EXPERTISE OF AN EXPERIENCED CRYSTALLOGRAPHIC REFEREE.

No syntax errors found.  
Please wait while processing ....

[CIF dictionary](#)  
[Interpreting this report](#)

### Datablock: I

### HMCO (5)

|                 |                                               |                    |
|-----------------|-----------------------------------------------|--------------------|
| Bond precision: | C-C = 0.0019 Å                                | Wavelength=0.71073 |
| Cell:           | a=6.7259 (4)    b=9.4836 (6)    c=13.2127 (9) |                    |
|                 | alpha=90    beta=90    gamma=90               |                    |
| Temperature:    | 120 K                                         |                    |

  

|                        | Calculated   | Reported     |
|------------------------|--------------|--------------|
| Volume                 | 842.78 (9)   | 842.78 (9)   |
| Space group            | P 21 21 21   | P 21 21 21   |
| Hall group             | P 2ac 2ab    | P 2ac 2ab    |
| Moiety formula         | C7 H9 N3 O3  | C7 H9 N3 O3  |
| Sum formula            | C7 H9 N3 O3  | C7 H9 N3 O3  |
| Mr                     | 183.17       | 183.17       |
| Dx, g cm <sup>-3</sup> | 1.444        | 1.444        |
| Z                      | 4            | 4            |
| Mu (mm <sup>-1</sup> ) | 0.115        | 0.115        |
| F000                   | 384.0        | 384.0        |
| F000'                  | 384.20       |              |
| h, k, lmax             | 7, 11, 15    | 7, 11, 15    |
| Nref                   | 1479 [ 884]  | 1478         |
| Tmin, Tmax             | 0.951, 0.966 | 0.909, 1.000 |
| Tmin'                  | 0.938        |              |

Correction method= NUMERICAL

Data completeness= 1.67/1.00    Theta(max)= 24.990

R(reflections)= 0.0249 ( 1428)    wR2(reflections)= 0.0633 ( 1478)

S = 1.082    Npar= 118

The following ALERTS were generated. Each ALERT has the format  
**test-name\_ALERT\_alert-type\_alert-level.**  
Click on the hyperlinks for more details of the test.

### ● Alert level C

STRVA01\_ALERT\_4\_C    Flack test results are meaningless.  
From the CIF: \_refine\_ls\_abs\_structure\_Flack -0.200  
From the CIF: \_refine\_ls\_abs\_structure\_Flack\_su 1.000

## Alert level G

PLAT005\_ALERT\_5\_G No \_iucr\_refine\_instructions\_details in the CIF ? Do !  
 PLAT007\_ALERT\_5\_G Note: Number of Unrefined Donor-H Atoms ..... 1  
 PLAT032\_ALERT\_4\_G Std. Uncertainty on Flack Parameter Value High . 1.000  
 PLAT230\_ALERT\_2\_G Hirshfeld Test Diff for C1 -- C2 .. 5.6 su  
 PLAT371\_ALERT\_2\_G Long C(sp2)-C(sp1) Bond C1 - C2 ... 1.45 Ang.  
 PLAT710\_ALERT\_4\_G Delete 1-2-3 or 2-3-4 Linear Torsion Angle ... # 1  
     N1 -C1 -C2 -N2 -22.00 6.00 1.555 1.555 1.555 1.555  
 PLAT710\_ALERT\_4\_G Delete 1-2-3 or 2-3-4 Linear Torsion Angle ... # 2  
     C3 -C1 -C2 -N2 165.00 6.00 1.555 1.555 1.555 1.555  
 PLAT909\_ALERT\_3\_G Percentage of Observed Data at Theta(Max) still 91 %  
 PLAT916\_ALERT\_2\_G Hooft y and Flack x Parameter values differ by . 0.80

0 **ALERT level A** = Most likely a serious problem - resolve or explain  
 0 **ALERT level B** = A potentially serious problem, consider carefully  
 2 **ALERT level C** = Check. Ensure it is not caused by an omission or oversight  
 9 **ALERT level G** = General information/check it is not something unexpected  
 0 ALERT type 1 CIF construction/syntax error, inconsistent or missing data  
 3 ALERT type 2 Indicator that the structure model may be wrong or deficient  
 2 ALERT type 3 Indicator that the structure quality may be low  
 4 ALERT type 4 Improvement, methodology, query or suggestion  
 2 ALERT type 5 Informative message, check

PLATON version of 01/06/2013; check.def file version of 24/05/2013

## Datablock I - ellipsoid plot

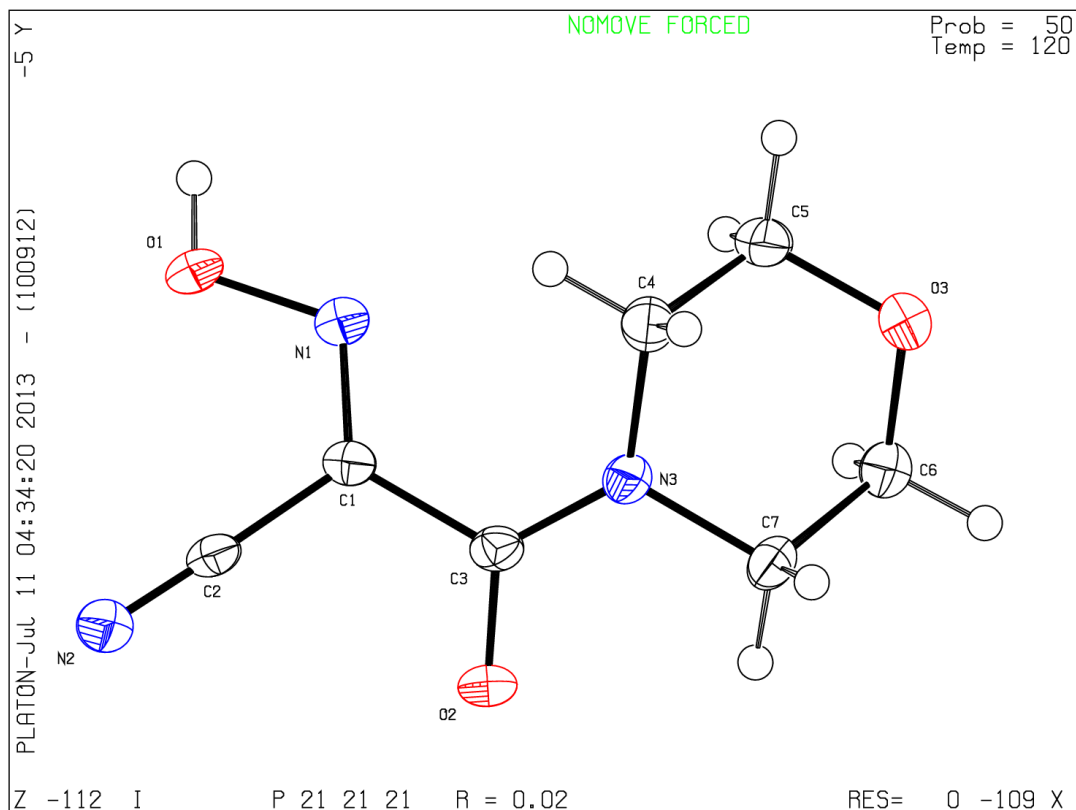

UV-visible spectra of protonated cyanoxime HMCO (**5**, blue), and its anion (**5<sup>-</sup>**, red) in aqueous solutions. Clearly seen bathochromic shifts of bands, and an intensity increase in the **5<sup>-</sup>** due to the delocalization of negative charge in formed conjugated anion.

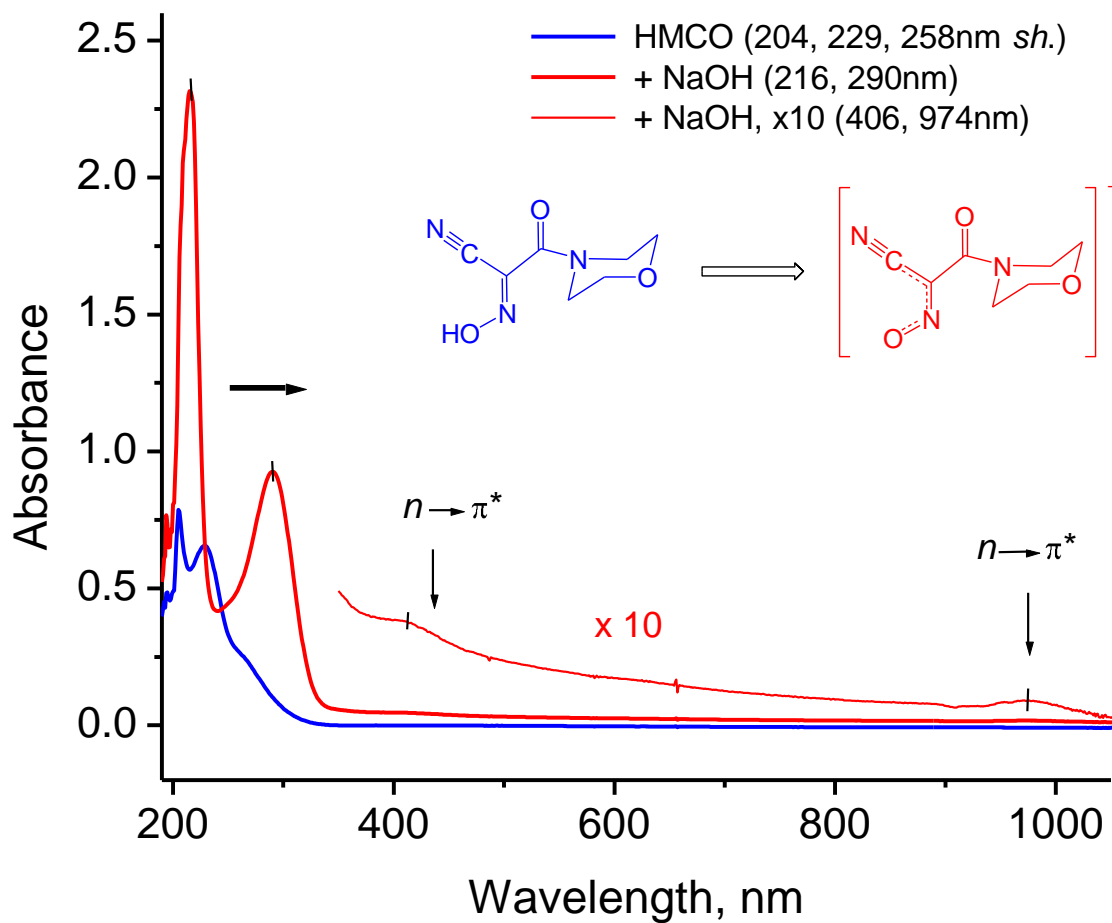

Solvatochromic series for MCO<sup>-</sup> anion (**5**<sup>-</sup>) in different solvents.

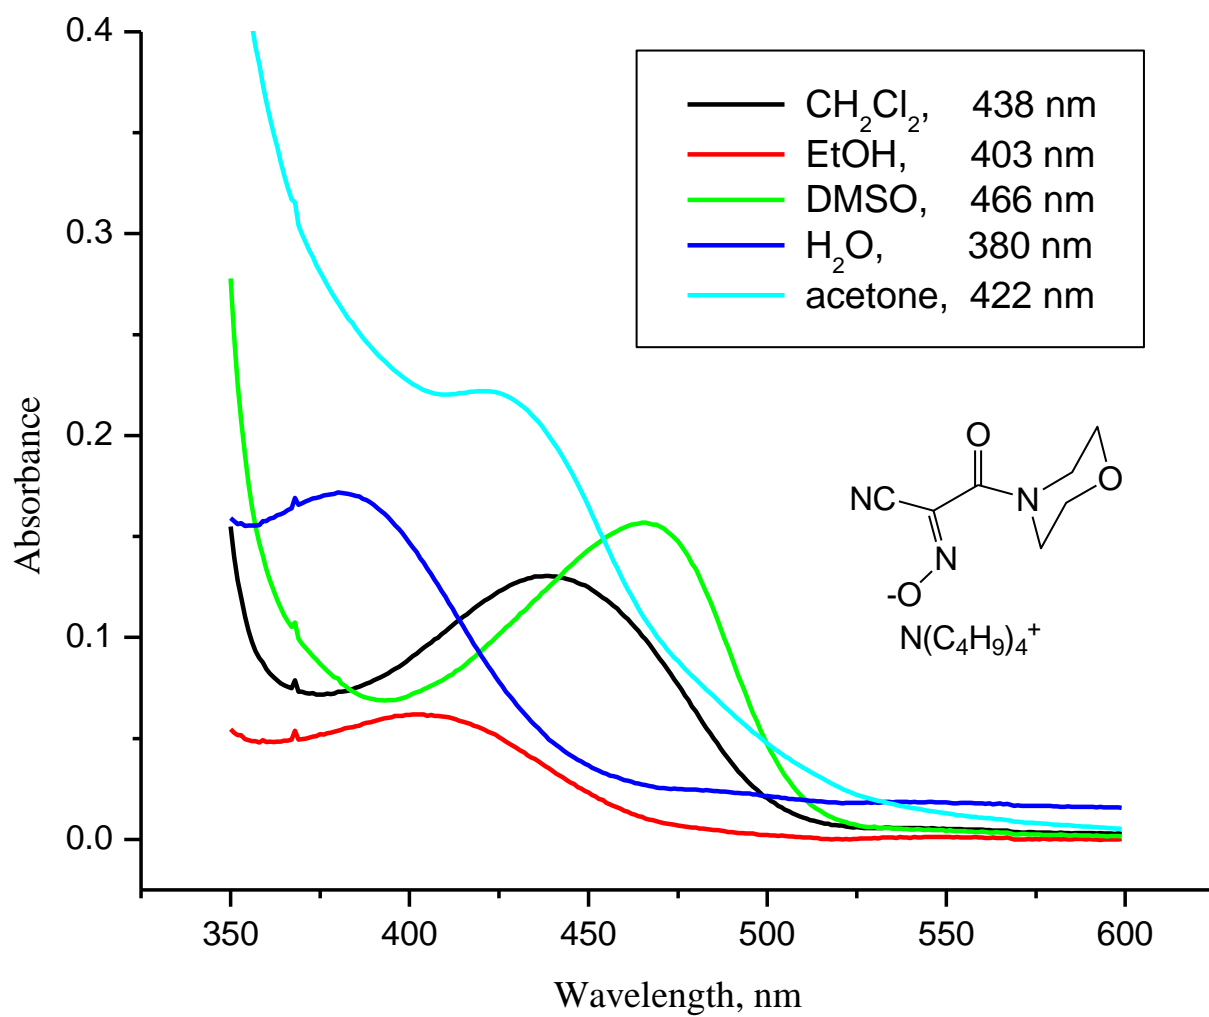

Solvatochromic series for PiPCO<sup>-</sup> anion (**2**<sup>-</sup>) in different solvents.

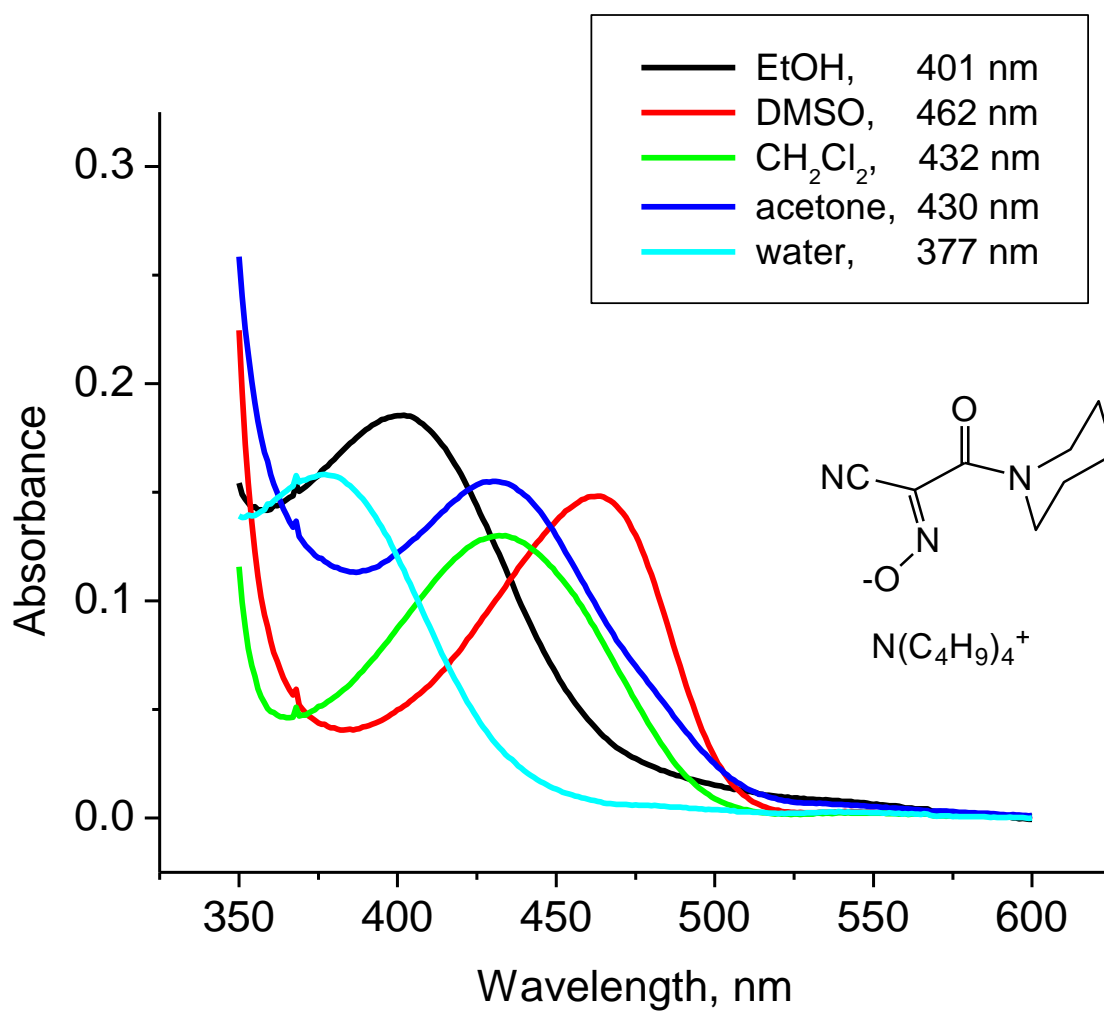

$^{13}\text{C}\{^1\text{H}\}$  NMR spectra of **5** in  $\text{dms}\text{-d}_6$  at 293 K.

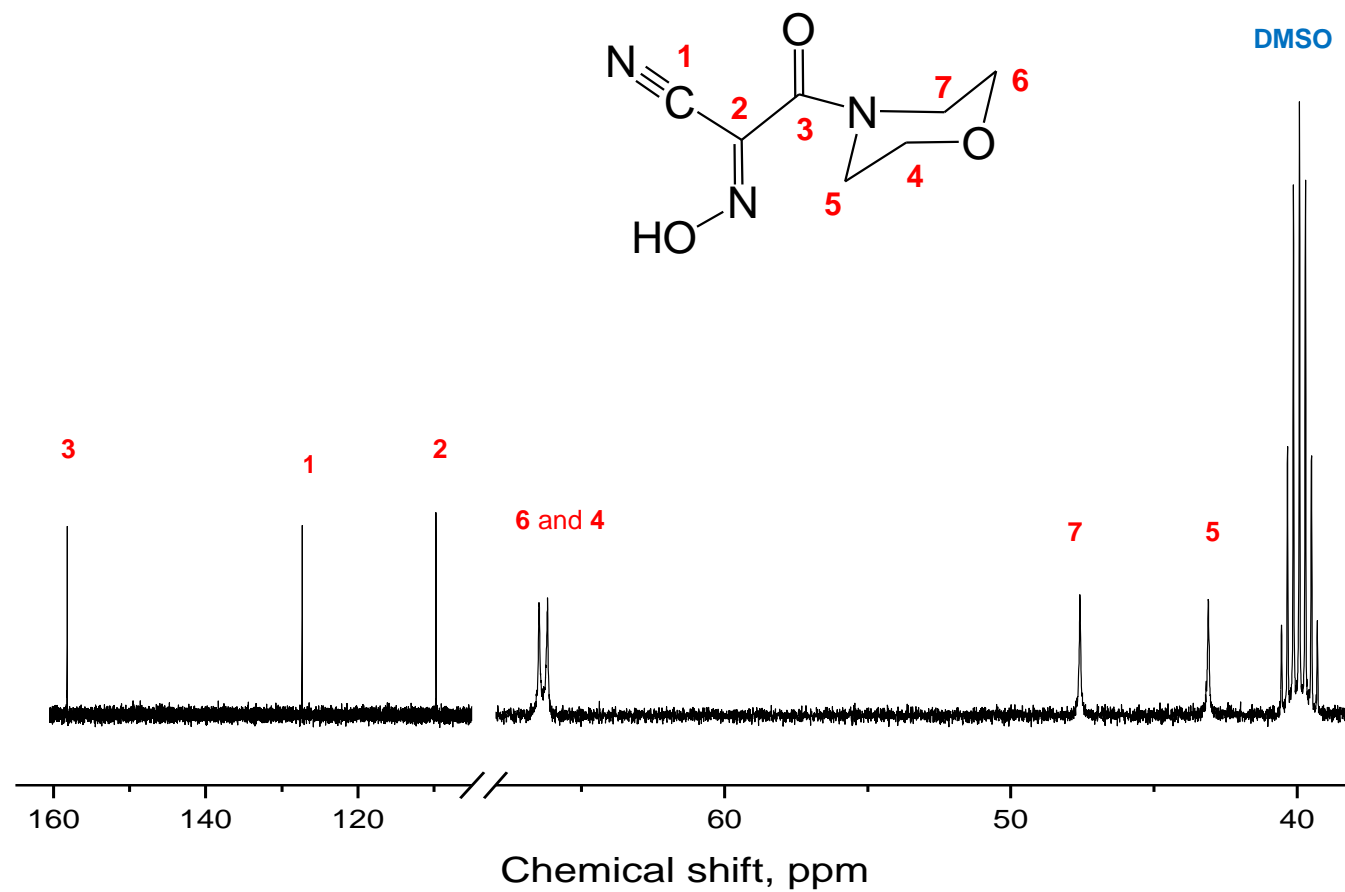

$^{13}\text{C}\{^1\text{H}\}$  NMR spectra of **2** in  $\text{dms}\text{-d}_6$  at 293 K. Shown  $\text{sp}$ ,  $\text{sp}^2$  carbons region only; second diastereomer (anti) is indicated by arrows.

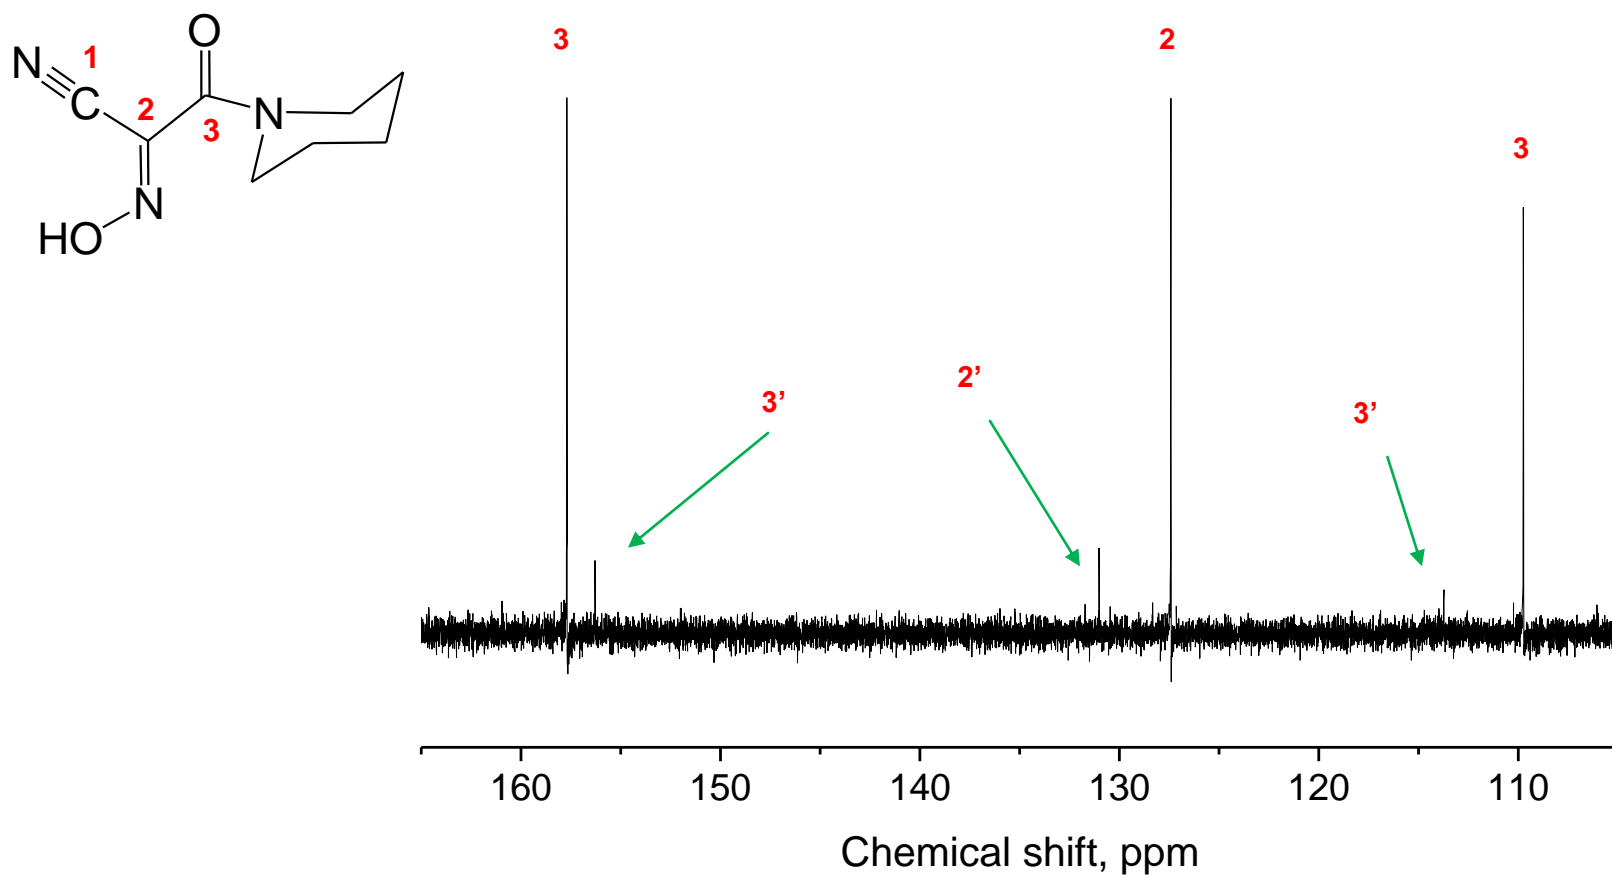

$^{13}\text{C}\{^1\text{H}\}$  NMR spectra of **2** in  $\text{dms}\text{-d}_6$  at 293 K. Shown aliphatic  $\text{sp}^3$  carbons region only; second diastereomer (anti) is indicated by arrows.

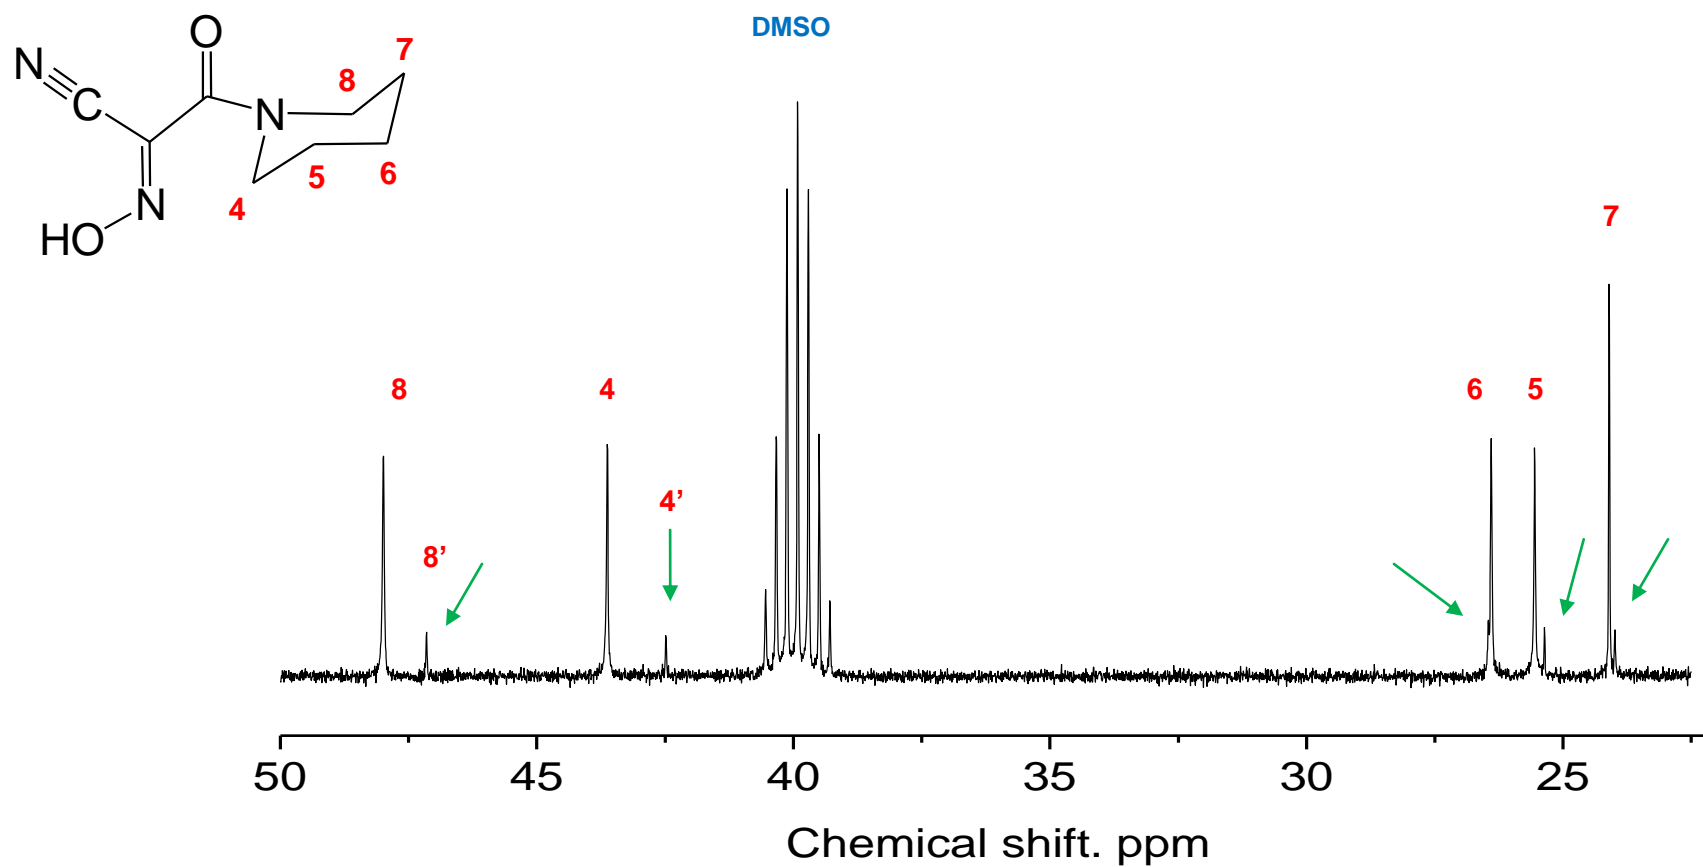

Results of studies of reflectance of MgO white standard subjected to UV-radiation. Slight dip at ~400 nm in reflectance profile is due to formation of point defects.

### White standard: MgO

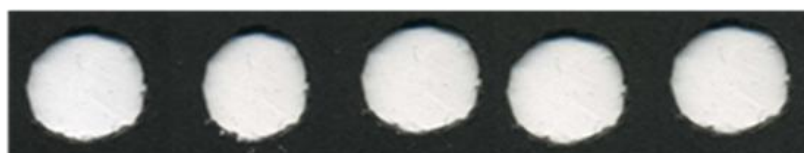

0 min    30 min    60 min    90 min    120 min

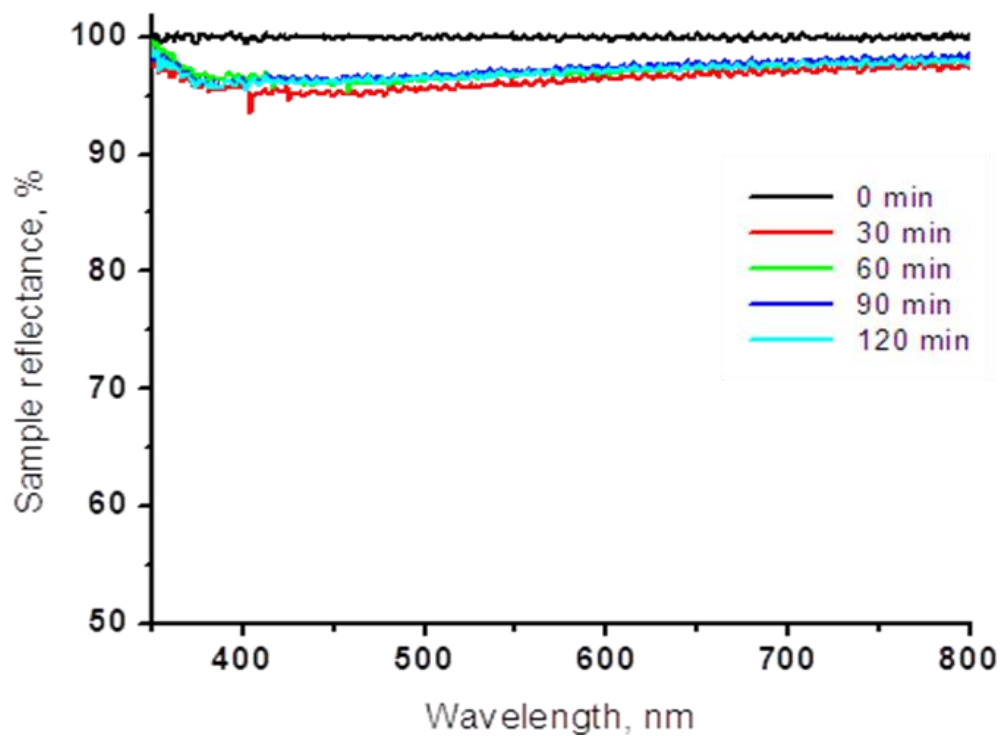

Reflectance spectra and actual photographs of samples of conventional light-sensitive inorganic salts AgCl (**A**) and AgNO<sub>3</sub> (**B**) recorded at different time intervals.

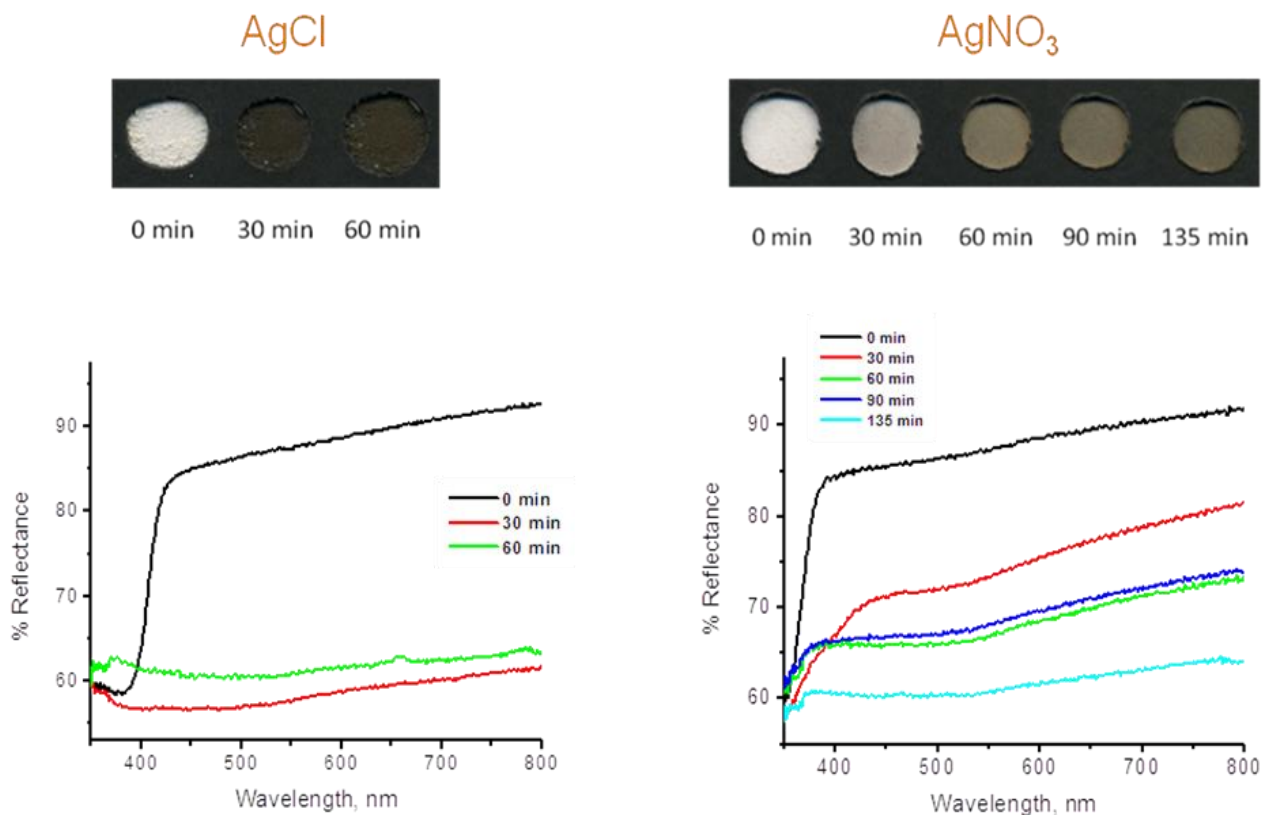

Time profiles of % reflectance of MgO, AgCl and AgNO<sub>3</sub> samples.

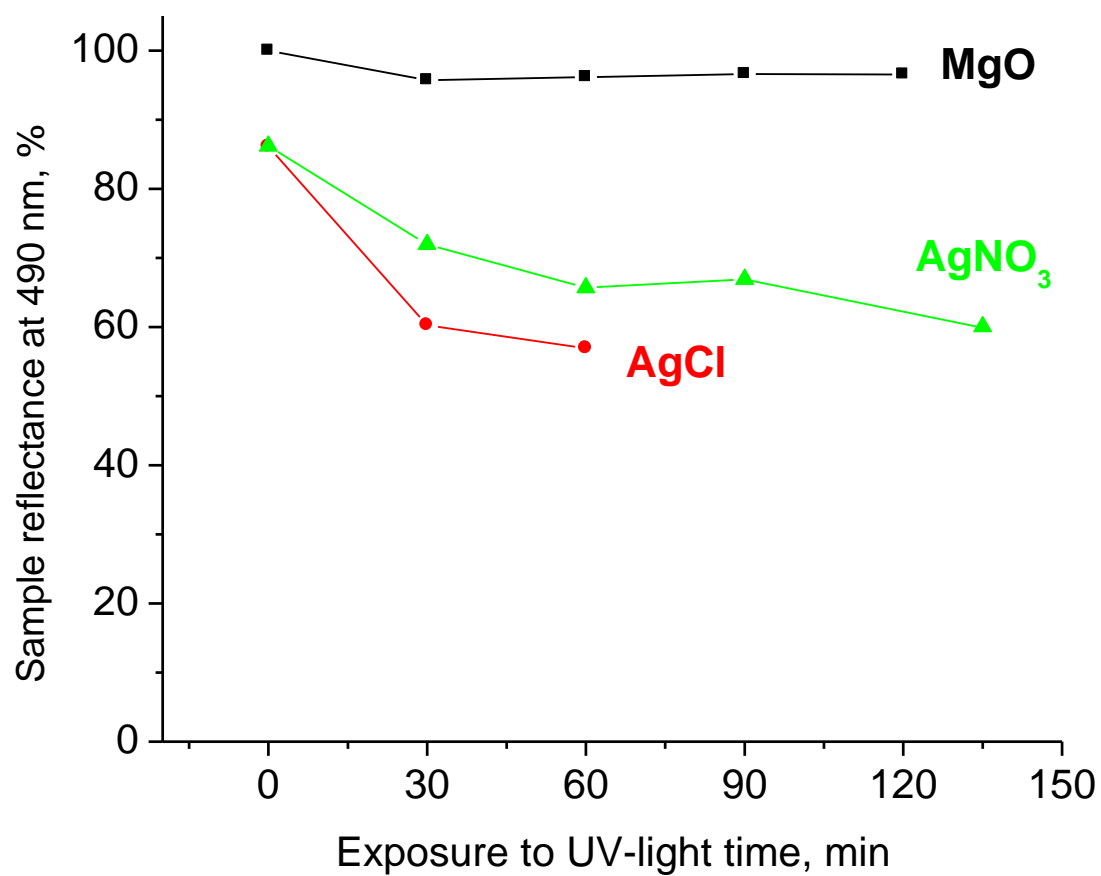

We empirically determined that the polymerization process has to be carried out using two different setups depending on the nature of used silver(I) cyanoximate (Figures 1 and 2 below). Thus, if we employ for the preparation of polymeric composite mostly *yellow* AgL complexes, the photo-polymerization reaction can be done quickly using an intense metal-halide lamp (Figure 1), where the 96-wells plate was placed directly onto the protective glass cover on the lamp. Such operation resulted in the formation of a solidified composite within several minutes. No visible signs of photodegradation of silver(I) cyanoximates was observed during the curing process.

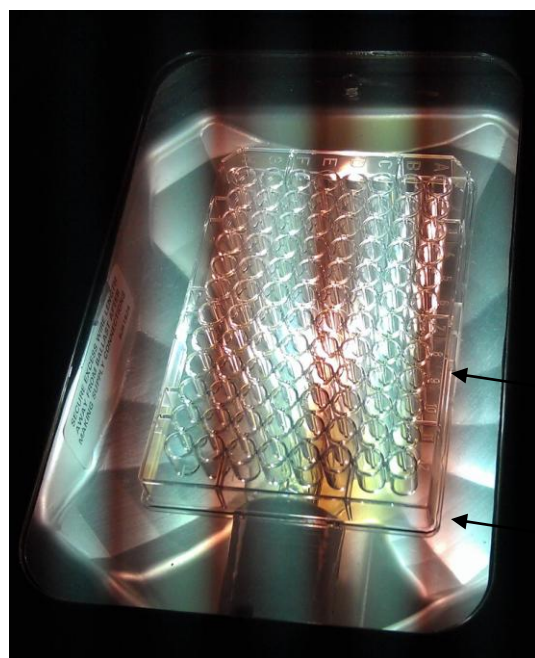

**Figure 1.**

A powerful metal-halide air-cooled lamp that was successfully used for polymerization of mixtures that contain yellow complexes. In order to exclude heat induced polymerization an intense air flow was applied to keep temperature in the plate at 296 K.

The plate on the top of the lamp.

Turned "ON" high-flux lamp.

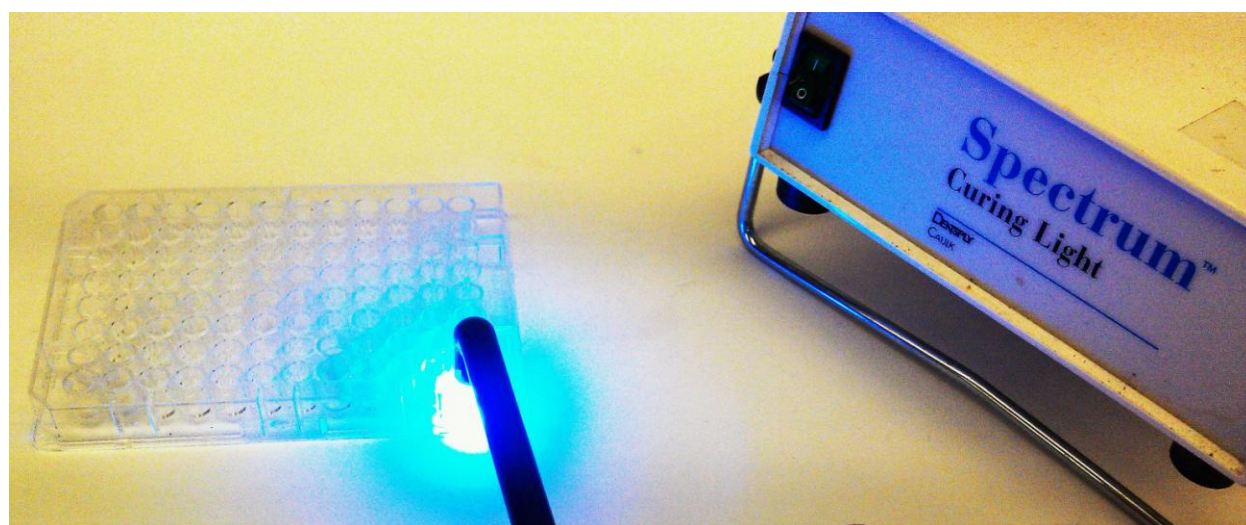

**Figure 2.** Mixtures with darker more *brownish* AgL complexes required manual irradiation.
